# Supplementary material
Source: publisher figshare collection journal article supplement (https://tandf.figshare.com/articles/dataset/_/7593905)
Supplement: Supplementary file 1 [file 2]

# Design of novel multi-epitope vaccines against Severe Acute respiratory syndrome validated through multistage molecular interaction and dynamics

Sukrit Srivastava<sup>\*a,c</sup>, Mohit Kamthania<sup>a,d</sup>, Rajesh Kumar Pandey<sup>b</sup>, Ajay Kumar Saxena<sup>c</sup>,  
Vaishali Saxena<sup>c</sup>, Santosh Kumar Singh<sup>b</sup>, Rakesh Kumar Sharma<sup>a</sup>, Nishi Sharma<sup>a</sup>

- a Department of Biotechnology, Mangalayatan University, Aligarh, India  
b Center of Experimental Medicine & Surgery, Institute of Medical Sciences, Banaras  
Hindu University, Varanasi, India  
c Molecular Medicine Lab., School of Life Science, Jawaharlal Nehru  
University, New Delhi, India  
d Department of Biotechnology, Faculty of Life Sciences, Institute of Applied  
Medicines and Research, Ghaziabad, India

\*Correspondence should be addressed to S.S. (sukrit.srivastav@mangalayatan.edu.in,  
srivastav.sukrit@gmail.com)

**Supplementary table S1. Protein sequence retrieval, tertiary structures retrieval and homology modeling of chosen SARS-CoV proteins.** SARS-CoV protein sequences were retrieved from NCBI. Available structure files (pdb) for SARS-CoV proteins were retrieved from RCSB PDB. SARS-CoV proteins with no tertiary structure available were subjected to homology modeling by Swissmodel.

| S.No | SARS-CoV Protein | Number of sequence retrieved from NCBI/PDB | PDB ID of Available Structure | Template used for modeling | QMEAN  |
|------|------------------|--------------------------------------------|-------------------------------|----------------------------|--------|
| 1    | 3a               | 47                                         | -                             | 5t77                       | - 2.29 |
| 2    | 3b               | 46                                         | -                             | 3qaz                       | - 0.09 |
| 3    | 7a               | 51                                         | -                             | 1xak                       | - 0.20 |
| 4    | 7b               | 57                                         | -                             | 5xtc                       | - 4.43 |
| 5    | 8a               | 45                                         | -                             | 3j2w                       | - 1.85 |
| 6    | 8b               | 45                                         | -                             | 5vz4                       | - 1.30 |
| 7    | 9b               | 46                                         | 2cme                          | -                          | -      |
| 8    | Envelope         | 212                                        | 5x29                          | -                          | -      |
| 9    | Membrane         | 170                                        | -                             | 4nv4                       | - 3.61 |
| 10   | Nucleocapsid     | 194                                        | 2gib                          | 4ud1                       | 0.58   |
| 11   | Spike            | 269                                        | 5xlr                          | -                          | -      |

**Supplementary table S2. Shortlisted high scoring CTL epitopes.** Selected high scoring CTL epitopes and their respective HLA alleles binders are listed above. *In-silico* analysis have shown all the selected epitopes to be non-toxic (Non-Toxin) as well as they show significant conservancy.

| S.No | SARS-CoV Proteins | Epitope     | IEDB epitope ID | Position  | Length | HLA Class I Alleles       | Percent of protein sequence matches at 100% identity (Conservancy) | ToxinPred Study |
|------|-------------------|-------------|-----------------|-----------|--------|---------------------------|--------------------------------------------------------------------|-----------------|
| 1    | 3a                | MEAQFLYLY   | 41300           | 101-109   | 9      | B*44:03, B*44:02          | 100.00% (4/4)                                                      | Non-Toxin       |
| 2    | 3a                | YLYALIYFL   | 75003           | 107-115   | 9      | A*02:01, A*02:06          | 100.00% (4/4)                                                      | Non-Toxin       |
| 3    | 3b                | SLYMAISPKF  | -               | 61-70     | 10     | A*23:01, B*15:01, A*24:02 | 100.00% (3/3)                                                      | Non-Toxin       |
| 4    | 3b                | LYMAISPKF   | 40855           | 62-70     | 9      | A*23:01, A*24:02          | 100.00% (3/3)                                                      | Non-Toxin       |
| 5    | 7a                | ALTCTSTHF   | -               | 55-63     | 9      | B*15:01                   | 62.50% (5/8)                                                       | Non-Toxin       |
| 6    | 7b                | TLIDFYLCFL  | 64842           | 5-14      | 10     | A*02:01                   | 60.00% (3/5)                                                       | Non-Toxin       |
| 7    | 8a                | SLCSCICTV   | 59033           | 11-19     | 9      | A*02:03                   | 100.00% (1/1)                                                      | Non-Toxin       |
| 8    | 8b                | ALIARCWYL   | 2618            | 55-63     | 9      | A*02:01                   | 100.00% (1/1)                                                      | Non-Toxin       |
| 9    | 9b                | KVYPIILRL   | -               | 41-49     | 9      | A*32:01                   | 100.00% (2/2)                                                      | Non-Toxin       |
| 10   | Envelope          | SLVKPTVYVY  | -               | 50-59     | 10     | B*15:01                   | 92.86% (13/14)                                                     | Non-Toxin       |
| 11   | Membrane          | MWLSYFVASF  | 43014           | 90-99     | 10     | A*23:01                   | 86.67% (13/15)                                                     | Non-Toxin       |
| 12   | Membrane          | SYFVASFRLF  | 62549           | 93-102    | 10     | A*23:01, A*24:02          | 86.67% (13/15)                                                     | Non-Toxin       |
| 13   | Nucleocapsid      | AQFAPSASAF  | -               | 306-315   | 10     | B*15:01                   | 100.00% (17/17)                                                    | Non-Toxin       |
| 14   | Nucleocapsid      | TPSGTWLTY   | 65763           | 326-334   | 9      | B*35:01                   | 94.12% (16/17)                                                     | Non-Toxin       |
| 15   | Spike             | LTQDLFLPFY  | 40134           | 54-63     | 10     | A*01:01                   | 98.88% (88/89)                                                     | Non-Toxin       |
| 16   | Spike             | IPFKDGIYF   | -               | 81-89     | 9      | B*35:01                   | 98.88% (88/89)                                                     | Non-Toxin       |
| 17   | Spike             | NAFNCTFEY   | 43144           | 155-163   | 9      | B*35:01                   | 97.75% (87/89)                                                     | Non-Toxin       |
| 18   | Spike             | LYNSTFFSTF  | 40884           | 355-364   | 10     | A*23:01, A*24:02          | 70.79% (63/89)                                                     | Non-Toxin       |
| 19   | Spike             | STFFSTFKCY  | -               | 358-367   | 10     | A*11:01, A*30:02          | 70.79% (63/89)                                                     | Non-Toxin       |
| 20   | Spike             | CYWPLNDYGF  | 7451            | 474-483   | 10     | A*23:01                   | 60.67% (54/89)                                                     | Non-Toxin       |
| 21   | Spike             | WPLNDYGFY   | -               | 476-484   | 9      | B*35:01                   | 60.67% (54/89)                                                     | Non-Toxin       |
| 22   | Spike             | RIYSTGNNVF  | -               | 620-629   | 10     | B*15:01                   | 97.75% (87/89)                                                     | Non-Toxin       |
| 23   | Spike             | LGADSSIAAY  | 36050           | 681-689   | 9      | B*35:01                   | 98.88% (88/89)                                                     | Non-Toxin       |
| 24   | Spike             | RSFIEDLLF   | -               | 797-805   | 9      | B*58:01                   | 97.75% (87/89)                                                     | Non-Toxin       |
| 25   | Spike             | LLTDDMIAAY  | -               | 846-855   | 10     | A*01:01                   | 93.26% (83/89)                                                     | Non-Toxin       |
| 26   | Spike             | LTDDMIAAY   | 39837           | 847-855   | 9      | A*01:01                   | 93.26% (83/89)                                                     | Non-Toxin       |
| 27   | Spike             | QIPFAMQMAY  | -               | 877-886   | 10     | B*35:01                   | 100.00% (89/89)                                                    | Non-Toxin       |
| 28   | Spike             | IPFAMQMAY   | -               | 878-886   | 9      | B*35:01                   | 100.00% (89/89)                                                    | Non-Toxin       |
| 29   | Spike             | FAMQMAYRF   | -               | 880-888   | 9      | B*35:01                   | 100.00% (89/89)                                                    | Non-Toxin       |
| 30   | Spike             | AYFPREGVFVF | -               | 1069-1079 | 11     | A*23:01                   | 98.88% (88/89)                                                     | Non-Toxin       |
| 31   | Spike             | FPREGVFVF   | 17382           | 1071-1079 | 9      | B*35:01                   | 98.88% (88/89)                                                     | Non-Toxin       |
| 32   | Spike             | KWPWYVWLGF  | -               | 1193-1202 | 10     | A*23:01, A*24:02          | 100.00% (89/89)                                                    | Non-Toxin       |

**Supplementary table S3. Shortlisted high scoring HTL epitopes.** Selected high scoring HTL epitopes and their respective HLA alleles binders are listed above. *In-silico* analysis have shown all the selected epitopes to be non-toxic (Non-Toxin) as well as they show significant conservancy.

| S.No | SARS Protein | Epitope         | IEDB epitope ID | Position | Length | HLA Class II Alleles                                                          | Percent of protein sequence matches at 100% identity (Conservancy) | ToxinPred Study |
|------|--------------|-----------------|-----------------|----------|--------|-------------------------------------------------------------------------------|--------------------------------------------------------------------|-----------------|
| 1    | 3a           | AQFLYLYALIYFLQC | -               | 103-117  | 15     | DPA1*01:03<br>DPB1*02:01<br>DPA1*01<br>DPB1*04:01                             | 100.00% (4/4)                                                      | Non-Toxin       |
| 2    | 3a           | QFLYLYALIYFLQCI | 50803           | 104-118  | 15     | DPA1*01:03<br>DPB1*02:01<br>DPA1*01<br>DPB1*04:01                             | 100.00% (4/4)                                                      | Non-Toxin       |
| 3    | 3b           | TMSLYMAISPKFTTS | 65259           | 59-73    | 15     | DRB1*09:01                                                                    | 100.00% (3/3)                                                      | Non-Toxin       |
| 4    | 7a           | SPLFLIVAALVFLIL | 60111           | 99-113   | 15     | DPA1*01:03<br>DPB1*02:01<br>DPA1*01<br>DPB1*04:01                             | 25.00% (2/8)                                                       | Non-Toxin       |
| 5    | 7a           | PLFLIVAALVFLILC | 48324           | 100-114  | 15     | DPA1*01:03<br>DPB1*02:01<br>DPA1*03:01<br>DPB1*04:02<br>DPA1*01<br>DPB1*04:01 | 25.00% (2/8)                                                       | Non-Toxin       |
| 6    | 7a           | LFLIVAALVFLILCF | -               | 101-115  | 15     | DPA1*01:03<br>DPB1*02:01<br>DPA1*03:01<br>DPB1*04:02<br>DPA1*01<br>DPB1*04:01 | 25.00% (2/8)                                                       | Non-Toxin       |
| 7    | 7a           | FLIVAALVFLILCFT | -               | 102-116  | 15     | DPA1*01:03<br>DPB1*02:01<br>DPA1*03:01<br>DPB1*04:02<br>DPA1*01<br>DPB1*04:01 | 25.00% (2/8)                                                       | Non-Toxin       |
| 8    | 7a           | LIVAALVFLILCFTI | -               | 103-117  | 15     | DPA1*01:03<br>DPB1*02:01<br>DPA1*03:01<br>DPB1*04:02<br>DPA1*01<br>DPB1*04:01 | 25.00% (2/8)                                                       | Non-Toxin       |
| 9    | 7b           | TLIDFYLCFLAFLLF | -               | 5-19.    | 15     | DPA1*01:03<br>DPB1*02:01<br>DPA1*01<br>DPB1*04:01                             | 60.00% (3/5)                                                       | Non-Toxin       |
| 10   | 7b           | LIDFYLCFLAFLFL  | -               | 6-20.    | 15     | DPA1*01:03<br>DPB1*02:01<br>DPA1*01<br>DPB1*04:01                             | 80.00% (4/5)                                                       | Non-Toxin       |
| 11   | 7b           | IDFYLCFLAFLFLV  | -               | 7-21.    | 15     | DPA1*01:03<br>DPB1*02:01<br>DPA1*03:01<br>DPB1*04:02<br>DPA1*01<br>DPB1*04:01 | 80.00% (4/5)                                                       | Non-Toxin       |

|    |          |                  |       |        |    |                                                                               |                |           |
|----|----------|------------------|-------|--------|----|-------------------------------------------------------------------------------|----------------|-----------|
| 12 | 7b       | DFYLCFLAFLFLVL   | -     | 8-22.  | 15 | DPA1*01:03<br>DPB1*02:01<br>DPA1*03:01<br>DPB1*04:02<br>DPA1*01<br>DPB1*04:01 | 80.00% (4/5)   | Non-Toxin |
| 13 | 7b       | FYLCFLAFLFLVLI   | -     | 9-23.  | 15 | DPA1*01:03<br>DPB1*02:01<br>DPA1*03:01<br>DPB1*04:02<br>DPA1*01<br>DPB1*04:01 | 80.00% (4/5)   | Non-Toxin |
| 14 | 7b       | YLCFLAFLFLVLIM   | 74578 | 10-24. | 15 | DPA1*01:03<br>DPB1*02:01<br>DPA1*03:01<br>DPB1*04:02<br>DPA1*01<br>DPB1*04:01 | 80.00% (4/5)   | Non-Toxin |
| 15 | 7b       | LCFLAFLFLVLIML   | -     | 11-25. | 15 | DPA1*01:03<br>DPB1*02:01<br>DPA1*03:01<br>DPA1*01<br>DPB1*04:01               | 80.00% (4/5)   | Non-Toxin |
| 16 | 7b       | CFLAFLFLVLIMLI   | -     | 12-26. | 15 | DPA1*01:03<br>DPB1*02:01<br>DPA1*03:01<br>DPB1*04:02<br>DPA1*01<br>DPB1*04:01 | 60.00% (3/5)   | Non-Toxin |
| 17 | 7b       | FLAFLFLVLIMLII   | 16500 | 13-27  | 15 | DPA1*01:03<br>DPB1*02:01<br>DPA1*03:01<br>DPB1*04:02<br>DPA1*01<br>DPB1*04:01 | 60.00% (3/5)   | Non-Toxin |
| 18 | 8a       | MKLLIVLTCISLCSC  | 41859 | 1-15.  | 15 | DRB1*11:01                                                                    | 100.00% (1/1)  | Non-Toxin |
| 19 | 8b       | ALGKVLFPFHRWHTMV | -     | 23-37  | 15 | DRB5*01:01                                                                    | 100.00% (1/1)  | Non-Toxin |
| 20 | 9b       | VVPPALHLVDPQIQL  | -     | 8-22.  | 15 | DRB3*01:01                                                                    | 100.00% (2/2)  | Non-Toxin |
| 21 | Envelope | NSVLLFLAFVVFLLV  | -     | 15-29  | 15 | DPA1*01:03<br>DPB1*02:01<br>DPA1*03:01<br>DPB1*04:02<br>DPA1*01<br>DPB1*04:01 | 71.43% (10/14) | Non-Toxin |
| 22 | Envelope | SVLLFLAFVVFLLV   | 62216 | 16-30  | 15 | DPA1*01:03<br>DPB1*02:01<br>DPA1*03:01<br>DPB1*04:02<br>DPA1*01<br>DPB1*04:01 | 64.29% (9/14)  | Non-Toxin |
| 23 | Envelope | VLLFLAFVVFLLVTL  | 69592 | 17-31  | 15 | DPA1*01:03<br>DPB1*02:01<br>DPA1*03:01<br>DPB1*04:02<br>DPA1*01<br>DPB1*04:01 | 64.29% (9/14)  | Non-Toxin |
| 24 | Envelope | LLFLAFVVFLLVTLA  | -     | 18-32  | 15 | DPA1*01:03<br>DPB1*02:01<br>DPA1*03:01<br>DPB1*04:02<br>DPA1*01<br>DPB1*04:01 | 64.29% (9/14)  | Non-Toxin |

|    |              |                 |       |         |    |                                                                               |                |           |
|----|--------------|-----------------|-------|---------|----|-------------------------------------------------------------------------------|----------------|-----------|
| 25 | Envelope     | LFLAFVVFLVTLAI  | -     | 19-33   | 15 | DPA1*01:03<br>DPB1*02:01<br>DPA1*03:01<br>DPB1*04:02<br>DPA1*01<br>DPB1*04:01 | 64.29% (9/14)  | Non-Toxin |
| 26 | Envelope     | FLAFVVFLVTLAIL  | 16503 | 20-34   | 15 | DPA1*01:03<br>DPB1*02:01<br>DPA1*03:01<br>DPB1*04:02<br>DPA1*01<br>DPB1*04:01 | 71.43% (10/14) | Non-Toxin |
| 27 | Envelope     | LAFVVFLVTLAILT  | 34768 | 21-35   | 15 | DPA1*01:03<br>DPB1*02:01<br>DPA1*03:01<br>DPB1*04:02<br>DPA1*01<br>DPB1*04:01 | 71.43% (10/14) | Non-Toxin |
| 28 | Membrane     | WNLVIGFLFLAWIML | -     | 19-33   | 15 | DPA1*03:01<br>DPB1*04:02<br>DPA1*01<br>DPB1*04:01                             | 73.33% (11/15) | Non-Toxin |
| 29 | Membrane     | NLVIGFLFLAWIMLL | -     | 20-34   | 15 | DPA1*03:01<br>DPB1*04:02<br>DPA1*01<br>DPB1*04:01                             | 73.33% (11/15) | Non-Toxin |
| 30 | Nucleocapsid | GTRNPNNNAATVLQL | -     | 148-162 | 15 | DQA1*01:02<br>DQB1*06:02                                                      | 94.12% (16/17) | Non-Toxin |
| 31 | Spike        | MFIFLLFLTSTGSD  | 41503 | 1-15.   | 15 | DPA1*01:03<br>DPB1*02:01<br>DPA1*01<br>DPB1*04:01                             | 85.39% (76/89) | Non-Toxin |
| 32 | Spike        | GYQPYRVVLSFELL  | -     | 490-504 | 15 | DPA1*01:03<br>DPB1*02:01                                                      | 97.75% (87/89) | Non-Toxin |
| 33 | Spike        | YQPYRVVLSFELLN  | -     | 491-505 | 15 | DPA1*01:03<br>DPB1*02:01                                                      | 97.75% (87/89) | Non-Toxin |
| 34 | Spike        | QPYRVVLSFELLNA  | -     | 492-506 | 15 | DPA1*01:03<br>DPB1*02:01                                                      | 98.88% (88/89) | Non-Toxin |
| 35 | Spike        | PYRVVLSFELLNAP  | -     | 493-507 | 15 | DPA1*01:03<br>DPB1*02:01                                                      | 98.88% (88/89) | Non-Toxin |
| 36 | Spike        | YRVVLSFELLNAPA  | -     | 494-508 | 15 | DPA1*01:03<br>DPB1*02:01                                                      | 98.88% (88/89) | Non-Toxin |

**Supplementary table S4. World population coverage by the shortlisted CTL and HTL epitopes combined.** With a standard deviation of 25.88 on an average 85.21 % of world population could be covered by the joint administration of selected CTL and HTL epitopes as vaccine candidate.

a projected population coverage

b average number of epitope hits / HLA combinations recognized by the population

c minimum number of epitope hits / HLA combinations recognized by 90% of the population

| Population/Area  | Class I & II combined |                          |                   |
|------------------|-----------------------|--------------------------|-------------------|
|                  | coverage <sup>a</sup> | average_hit <sup>b</sup> | pc90 <sup>c</sup> |
| Austria          | 99.33%                | 35.03                    | 17.04             |
| Belarus          | 27.09%                | 0.27                     | 0.14              |
| Belgium          | 99.03%                | 31.56                    | 5.81              |
| Borneo           | 39.34%                | 10.08                    | 2.42              |
| Bulgaria         | 94.35%                | 5.38                     | 1.48              |
| Canada           | 2.25%                 | 0.02                     | 0.1               |
| Central Africa   | 99.71%                | 51.05                    | 23.36             |
| Central America  | 94.41%                | 19.21                    | 19.05             |
| China            | 98.82%                | 35.92                    | 4.8               |
| Croatia          | 96.04%                | 6.47                     | 1.94              |
| Czech Republic   | 99.5%                 | 36.59                    | 22.03             |
| Denmark          | 58.23%                | 0.71                     | 0.24              |
| East Africa      | 99.45%                | 42.6                     | 20.66             |
| East Asia        | 98.29%                | 26.13                    | 4.04              |
| England          | 99.7%                 | 33.75                    | 9.22              |
| Europe           | 99.97%                | 60.33                    | 34.2              |
| Finland          | 99.44%                | 35.48                    | 13.76             |
| France           | 99.99%                | 62.23                    | 36.8              |
| Georgia          | 98.87%                | 31.98                    | 5.81              |
| Germany          | 99.72%                | 34.89                    | 11.61             |
| Greece           | 96.82%                | 32.64                    | 19.53             |
| Hong Kong        | 90.27%                | 3.25                     | 1.01              |
| India            | 99.42%                | 53.26                    | 29.48             |
| Indonesia        | 92.27%                | 14.27                    | 1.16              |
| Iran             | 90.26%                | 4.22                     | 1.01              |
| Ireland Northern | 99.71%                | 34.79                    | 23.07             |
| Ireland South    | 99.65%                | 33.5                     | 19.52             |
| Israel           | 84.02%                | 3.91                     | 0.63              |
| Italy            | 98.31%                | 29.45                    | 4.19              |
| Japan            | 99.23%                | 41.01                    | 7.09              |
| Jordan           | 81.67%                | 2.89                     | 0.55              |
| Korea; South     | 97.49%                | 16.89                    | 2.36              |
| Lebanon          | 95.11%                | 32.27                    | 19.27             |
| Macedonia        | 72.67%                | 1.05                     | 0.37              |
| Malaysia         | 91.03%                | 16.96                    | 1.09              |
| Mexico           | 100.0%                | 59.0                     | 49.08             |
| Mongolia         | 98.81%                | 32.82                    | 8.37              |
| Netherlands      | 94.02%                | 28.61                    | 1.81              |
| North Africa     | 97.75%                | 30.28                    | 4.12              |
| North America    | 99.99%                | 58.12                    | 34.32             |
| Northeast Asia   | 98.88%                | 35.93                    | 4.83              |
| Norway           | 96.4%                 | 29.37                    | 19.13             |
| Oceania          | 99.43%                | 43.58                    | 7.88              |
| Oman             | 90.69%                | 4.44                     | 1.04              |
| Pakistan         | 79.95%                | 2.42                     | 0.5               |
| Philippines      | 93.71%                | 4.57                     | 1.56              |
| Poland           | 96.53%                | 6.06                     | 2.01              |
| Portugal         | 93.57%                | 5.58                     | 1.36              |
| Romania          | 92.88%                | 5.98                     | 1.36              |
| Russia           | 99.99%                | 67.31                    | 49.97             |
| Saudi Arabia     | 97.9%                 | 30.73                    | 8.03              |
| Scotland         | 68.25%                | 0.96                     | 0.31              |
| Serbia           | 35.2%                 | 1.91                     | 0.15              |

|                      |        |       |         |
|----------------------|--------|-------|---------|
| Singapore            | 93.6%  | 14.3  | 1.24    |
| Slovakia             | 59.71% | 23.23 | -7.18   |
| Slovenia             | 99.9%  | 58.54 | 31.82   |
| South Africa         | 0.31%  | 3.35  | -714.81 |
| South America        | 98.69% | 46.09 | 21.66   |
| South Asia           | 99.56% | 53.48 | 29.68   |
| Southeast Asia       | 95.96% | 12.57 | 1.52    |
| Southwest Asia       | 98.24% | 33.66 | 19.22   |
| Spain                | 99.78% | 53.13 | 30.56   |
| Sri Lanka            | 52.39% | 1.2   | 0.21    |
| Sweden               | 99.99% | 65.24 | 48.66   |
| Taiwan               | 97.73% | 14.35 | 1.94    |
| Thailand             | 95.05% | 12.36 | 1.3     |
| Turkey               | 73.09% | 1.97  | 0.37    |
| Ukraine              | 33.58% | 0.34  | 0.15    |
| United Arab Emirates | 2.19%  | 0.11  | 0.51    |
| United Kingdom       | 68.78% | 21.39 | -9.36   |
| United States        | 100.0% | 58.13 | 33.93   |
| Vietnam              | 88.6%  | 3.16  | 0.88    |
| Wales                | 1.0%   | 0.01  | 0.1     |
| West Africa          | 97.41% | 30.85 | 3.1     |
| West Indies          | 95.45% | 6.25  | 1.57    |
|                      |        |       |         |
| World                | 99.39% | 45.44 | 20.76   |
|                      |        |       |         |
| Average              | 85.21  | 24.83 | 1.03    |
| Standard deviation   | 25.88  | 20.07 | 83.75   |

**Supplementary table S5. Shortlisted B Cell epitopes.** BepiPred Linear B Cell epitopes showing sequence overlap with CTL and HTL epitopes are shortlisted above. *In-silico* analysis have shown all the selected epitopes to be non-toxic (Non-Toxin) as well as they show significant amino acid sequence conservancy.

| S.No. | SARS-CoV Protein | B Cell Epitope       | Position  | Length | Percent of protein sequence matches at 100% identity (Conservancy) | ToxinPred Study |
|-------|------------------|----------------------|-----------|--------|--------------------------------------------------------------------|-----------------|
| 1     | 3b               | AISPKFTTSL           | 65-74     | 10     | 100.00% (3/3)                                                      | Non-Toxin       |
| 2     | 7b               | MNELTLI              | 1-7.      | 7      | 80.00% (4/5)                                                       | Non-Toxin       |
| 3     | 8b               | VQTCTPNVTINCQDPAGGAL | 37-56     | 20     | 100.00% (1/1)                                                      | Non-Toxin       |
| 4     | 9b               | MDPNQTNVVP           | 1-10.     | 10     | 100.00% (2/2)                                                      | Non-Toxin       |
| 5     | 9b               | DAMGQGQNSADPKV       | 29-42     | 14     | 100.00% (2/2)                                                      | Non-Toxin       |
| 6     | Nucleocapsid     | DHIGTRNPNNN          | 145-155   | 11     | 100.00% (17/17)                                                    | Non-Toxin       |
| 7     | Spike            | HTFGNPVPIFK          | 74-84     | 11     | 60.67% (54/89)                                                     | Non-Toxin       |
| 8     | Spike            | YFAATEKSNV           | 88-97     | 10     | 98.88% (88/89)                                                     | Non-Toxin       |
| 9     | Spike            | YGFYTTTGIGYQ         | 481-492   | 12     | 66.29% (59/89)                                                     | Non-Toxin       |
| 10    | Spike            | ATVCGPKLSTD          | 508-518   | 11     | 98.88% (88/89)                                                     | Non-Toxin       |
| 11    | Spike            | RIYSTGNNVFQT         | 620-631   | 12     | 97.75% (87/89)                                                     | Non-Toxin       |
| 12    | Spike            | SLGADSSIAYSNNIAIP    | 680-697   | 18     | 98.88% (88/89)                                                     | Non-Toxin       |
| 13    | Spike            | ILPDPLKPTKRS         | 787-798   | 12     | 93.26% (83/89)                                                     | Non-Toxin       |
| 14    | Spike            | KAYFP                | 1068-1072 | 5      | 98.88% (88/89)                                                     | Non-Toxin       |

**Supplementary table S6. CTL epitope prediction.** Detailed scoring of all screened CTL epitopes and their respective HLA class I allele binders. CTL epitopes were chosen on the basis of high “Total score” and higher number of HLA allele binders. Total score is a combined score of TAP score, MHC score, Proteasome score and Processing score.

| S.No. | SARS-CoV Protein | Epitope     | HLA Class I Alleles | Proteasome Score | TAP Score | MHC Score | Processing Score | Total Score | MHC IC50[nM] | Immunogenicity-Score |
|-------|------------------|-------------|---------------------|------------------|-----------|-----------|------------------|-------------|--------------|----------------------|
| 1     | 3a               | MEAQFLYLY   | B*44:03             | 1.43             | 1.23      | -0.78     | 2.66             | 1.88        | 6            | -0.0099              |
|       |                  |             | B*44:02             | 1.43             | 1.23      | -1.00     | 2.66             | 1.66        | 10.1         | -0.0099              |
| 2     | 3a               | YLYALIYFL   | A*02:01             | 1.47             | 0.52      | -0.40     | 1.99             | 1.59        | 2.5          | 0.21793              |
|       |                  |             | A*02:06             | 1.47             | 0.52      | -0.60     | 1.99             | 1.39        | 4            | 0.21793              |
| 3     | 3b               | SLYMAISPKF  | A*23:01             | 1.35             | 1.23      | -0.96     | 2.57             | 1.61        | 9.2          | -0.30129             |
|       |                  |             | B*15:01             | 1.35             | 1.23      | -1.10     | 2.57             | 1.47        | 12.6         | -0.30129             |
|       |                  |             | A*24:02             | 1.35             | 1.23      | -1.12     | 2.57             | 1.45        | 13.2         | -0.30129             |
| 4     | 3b               | LYMAISPKF   | A*23:01             | 1.35             | 1.27      | -0.70     | 2.61             | 1.92        | 5            | -0.17912             |
|       |                  |             | A*24:02             | 1.35             | 1.27      | -0.91     | 2.61             | 1.70        | 8.2          | -0.17912             |
| 5     | 7a               | ALTCTSTHF   | B*15:01             | 1.48             | 1.11      | -1.37     | 2.59             | 1.21        | 23.7         | -0.10792             |
| 6     | 7b               | TLIDFYLCFL  | A*02:01             | 1.70             | 0.47      | -0.93     | 2.17             | 1.24        | 8.6          | 0.18838              |
| 7     | 8a               | SLCSCICTV   | A*02:03             | 1.09             | 0.17      | -0.89     | 1.27             | 0.37        | 7.8          | -0.13401             |
| 8     | 8b               | ALIARCWYL   | A*02:01             | 1.39             | 0.50      | -0.76     | 1.89             | 1.13        | 5.8          | 0.267                |
| 9     | 9b               | KVYPIILRL   | A*32:01             | 1.51             | 0.54      | -1.13     | 2.05             | 0.92        | 13.5         | 0.2634               |
| 10    | Envelope         | SLVKPTVYVY  | B*15:01             | 1.51             | 1.36      | -1.50     | 2.87             | 1.37        | 31.5         | -0.11674             |
| 11    | Membrane         | MWLSYFVASF  | A*23:01             | 1.38             | 1.26      | -0.90     | 2.63             | 1.73        | 8            | -0.08445             |
| 12    | Membrane         | SYFVASFRLF  | A*23:01             | 1.25             | 1.31      | -0.56     | 2.56             | 2.00        | 3.6          | 0.10394              |
|       |                  |             | A*24:02             | 1.25             | 1.31      | -0.79     | 2.56             | 1.78        | 6.1          | 0.10394              |
| 13    | Nucleocapsid     | AQFAPSASAF  | B*15:01             | 1.23             | 1.25      | -0.70     | 2.48             | 1.78        | 5            | -0.17446             |
| 14    | Nucleocapsid     | TPSGTWLTY   | B*35:01             | 1.53             | 1.15      | -0.84     | 2.67             | 1.83        | 6.9          | 0.24003              |
| 15    | Spike            | LTQDLFLPFY  | A*01:01             | 1.52             | 1.23      | -1.05     | 2.74             | 1.70        | 11.2         | 0.13652              |
| 16    | Spike            | IPFKDGIYF   | B*35:01             | 1.39             | 1.05      | -0.82     | 2.44             | 1.62        | 6.6          | -0.01534             |
| 17    | Spike            | NAFNCTFEY   | B*35:01             | 1.11             | 1.30      | -0.59     | 2.41             | 1.82        | 3.9          | 0.17283              |
| 18    | Spike            | LYNSTFFSTF  | A*23:01             | 1.38             | 1.20      | -0.75     | 2.57             | 1.82        | 5.6          | -0.02351             |
|       |                  |             | A*24:02             | 1.38             | 1.20      | -0.88     | 2.57             | 1.70        | 7.5          | -0.02351             |
| 19    | Spike            | STFFSTFKCY  | A*11:01             | 1.48             | 1.39      | -1.34     | 2.87             | 1.53        | 22           | -0.0708              |
|       |                  |             | A*30:02             | 1.48             | 1.39      | -1.46     | 2.87             | 1.41        | 28.7         | -0.0708              |
| 20    | Spike            | CYWPLNDYGF  | A*23:01             | 1.44             | 1.33      | -1.10     | 2.78             | 1.68        | 12.5         | 0.0812               |
| 21    | Spike            | WPLNDYGFY   | B*35:01             | 1.34             | 1.11      | -0.85     | 2.45             | 1.60        | 7            | 0.10501              |
| 22    | Spike            | RIYSTGNNVF  | B*15:01             | 1.53             | 1.32      | -1.21     | 2.85             | 1.64        | 16.3         | -0.0843              |
| 23    | Spike            | LGADSSIAY   | B*35:01             | 1.60             | 1.19      | -1.20     | 2.79             | 1.59        | 15.9         | -0.14663             |
| 24    | Spike            | RSFIEDLLF   | B*58:01             | 1.23             | 1.32      | -0.72     | 2.54             | 1.82        | 5.3          | 0.27446              |
| 25    | Spike            | LLTDDMIAAY  | A*01:01             | 1.38             | 1.20      | -0.94     | 2.58             | 1.64        | 8.7          | 0.06668              |
| 26    | Spike            | LTDDMIAAY   | A*01:01             | 1.38             | 1.21      | -0.63     | 2.59             | 1.95        | 4.3          | 0.03968              |
| 27    | Spike            | QIPFAMQMAY  | B*35:01             | 1.42             | 1.35      | -1.16     | 2.77             | 1.61        | 14.5         | -0.25308             |
| 28    | Spike            | IPFAMQMAY   | B*35:01             | 1.42             | 1.17      | -0.36     | 2.60             | 2.24        | 2.3          | -0.32801             |
| 29    | Spike            | FAMQMAYRF   | B*35:01             | 1.45             | 1.05      | -0.80     | 2.50             | 1.70        | 6.3          | -0.28061             |
| 30    | Spike            | AYFPREGVFVF | A*23:01             | 1.44             | 1.37      | -1.17     | 2.81             | 1.64        | 14.8         | 0.36952              |
| 31    | Spike            | FPREGVFVF   | B*35:01             | 1.44             | 0.93      | -0.51     | 2.37             | 1.86        | 3.2          | 0.31233              |
| 32    | Spike            | KWPWYVWLGF  | A*23:01             | 1.26             | 1.25      | -1.03     | 2.51             | 1.48        | 10.8         | 0.47484              |
|       |                  |             | A*24:02             | 1.26             | 1.25      | -1.13     | 2.51             | 1.39        | 13.4         | 0.47484              |



**Supplementary table S7. HTL epitope prediction.** Percentile rank of HTL epitopes and their respective HLA class II allele binders. HTL epitopes were screened on the basis of percentile rank (lower the percentile number, higher the rank) and larger number of HLA allele binders. Last column show the method used for epitope screening.

| S.No | SARS-CoV Protein | Epitope              | HLA Class II Alleles  | Percentile rank | Method used                   |
|------|------------------|----------------------|-----------------------|-----------------|-------------------------------|
| 1    | 3a               | AQFLYLYALIYFLQC      | DPA1*01:03/DPB1*02:01 | 0.01            | Consensus (comb.lib./simm/nn) |
|      |                  |                      | DPA1*01/DPB1*04:01    | 0.01            | Consensus (comb.lib./simm/nn) |
| 2    | 3a               | QFLYLYALIYFLQCI      | DPA1*01:03/DPB1*02:01 | 0.01            | Consensus (comb.lib./simm/nn) |
|      |                  |                      | DPA1*01/DPB1*04:01    | 0.01            | Consensus (comb.lib./simm/nn) |
| 3    | 3b               | TMSLYMAISPKFTTS      | DRB1*09:01            | 0.01            | Consensus (comb.lib./simm/nn) |
| 4    | 7a               | SPLFLIVAALVFLIL      | DPA1*01:03/DPB1*02:01 | 0.01            | Consensus (comb.lib./simm/nn) |
|      |                  |                      | DPA1*01/DPB1*04:01    | 0.01            | Consensus (comb.lib./simm/nn) |
| 5    | 7a               | PLFLIVAALVFLILC      | DPA1*01:03/DPB1*02:01 | 0.01            | Consensus (comb.lib./simm/nn) |
|      |                  |                      | DPA1*03:01/DPB1*04:02 | 0.01            | Consensus (comb.lib./simm/nn) |
|      |                  |                      | DPA1*01/DPB1*04:01    | 0.01            | Consensus (comb.lib./simm/nn) |
| 6    | 7a               | LFLIVAALVFLILCF      | DPA1*01:03/DPB1*02:01 | 0.01            | Consensus (comb.lib./simm/nn) |
|      |                  |                      | DPA1*03:01/DPB1*04:02 | 0.01            | Consensus (comb.lib./simm/nn) |
|      |                  |                      | DPA1*01/DPB1*04:01    | 0.01            | Consensus (comb.lib./simm/nn) |
| 7    | 7a               | FLIVAALVFLILCFT      | DPA1*01:03/DPB1*02:01 | 0.01            | Consensus (comb.lib./simm/nn) |
|      |                  |                      | DPA1*03:01/DPB1*04:02 | 0.01            | Consensus (comb.lib./simm/nn) |
|      |                  |                      | DPA1*01/DPB1*04:01    | 0.01            | Consensus (comb.lib./simm/nn) |
| 8    | 7a               | LIVAALVFLILCFTI      | DPA1*01:03/DPB1*02:01 | 0.01            | Consensus (comb.lib./simm/nn) |
|      |                  |                      | DPA1*03:01/DPB1*04:02 | 0.01            | Consensus (comb.lib./simm/nn) |
|      |                  |                      | DPA1*01/DPB1*04:01    | 0.01            | Consensus (comb.lib./simm/nn) |
| 9    | 7b               | TLIDFYLCFLAFLLF      | DPA1*01:03/DPB1*02:01 | 0.01            | Consensus (comb.lib./simm/nn) |
|      |                  |                      | DPA1*01/DPB1*04:01    | 0.01            | Consensus (comb.lib./simm/nn) |
| 10   | 7b               | LIDFYLCFLAFLFL       | DPA1*01:03/DPB1*02:01 | 0.01            | Consensus (comb.lib./simm/nn) |
|      |                  |                      | DPA1*01/DPB1*04:01    | 0.01            | Consensus (comb.lib./simm/nn) |
| 11   | 7b               | IDFYLCFLAFLFLV       | DPA1*01:03/DPB1*02:01 | 0.01            | Consensus (comb.lib./simm/nn) |
|      |                  |                      | DPA1*03:01/DPB1*04:02 | 0.01            | Consensus (comb.lib./simm/nn) |
|      |                  |                      | DPA1*01/DPB1*04:01    | 0.01            | Consensus (comb.lib./simm/nn) |
| 12   | 7b               | DFYLCFLAFLFLVL       | DPA1*01:03/DPB1*02:01 | 0.01            | Consensus (comb.lib./simm/nn) |
|      |                  |                      | DPA1*03:01/DPB1*04:02 | 0.01            | Consensus (comb.lib./simm/nn) |
|      |                  |                      | DPA1*01/DPB1*04:01    | 0.01            | Consensus (comb.lib./simm/nn) |
| 13   | 7b               | FYLCFLAFLFLVLI       | DPA1*01:03/DPB1*02:01 | 0.01            | Consensus (comb.lib./simm/nn) |
|      |                  |                      | DPA1*03:01/DPB1*04:02 | 0.01            | Consensus (comb.lib./simm/nn) |
|      |                  |                      | DPA1*01/DPB1*04:01    | 0.01            | Consensus (comb.lib./simm/nn) |
| 14   | 7b               | YLCFLAFLFLVLIM       | DPA1*01:03/DPB1*02:01 | 0.01            | Consensus (comb.lib./simm/nn) |
|      |                  |                      | DPA1*03:01/DPB1*04:02 | 0.01            | Consensus (comb.lib./simm/nn) |
|      |                  |                      | DPA1*01/DPB1*04:01    | 0.01            | Consensus (comb.lib./simm/nn) |
| 15   | 7b               | LCFLAFLFLVLIML       | DPA1*01:03/DPB1*02:01 | 0.01            | Consensus (comb.lib./simm/nn) |
|      |                  |                      | DPA1*03:01/DPB1*04:02 | 0.01            | Consensus (comb.lib./simm/nn) |
|      |                  |                      | DPA1*01/DPB1*04:01    | 0.01            | Consensus (comb.lib./simm/nn) |
| 16   | 7b               | CFLAFLFLVLIMLI       | DPA1*01:03/DPB1*02:01 | 0.01            | Consensus (comb.lib./simm/nn) |
|      |                  |                      | DPA1*03:01/DPB1*04:02 | 0.01            | Consensus (comb.lib./simm/nn) |
|      |                  |                      | DPA1*01/DPB1*04:01    | 0.01            | Consensus (comb.lib./simm/nn) |
| 17   | 7b               | FLAFLFLVLIMLII       | DPA1*01:03/DPB1*02:01 | 0.01            | Consensus (comb.lib./simm/nn) |
|      |                  |                      | DPA1*03:01/DPB1*04:02 | 0.01            | Consensus (comb.lib./simm/nn) |
|      |                  |                      | DPA1*01/DPB1*04:01    | 0.01            | Consensus (comb.lib./simm/nn) |
| 18   | 8a               | MKLLIVLTCISLCSC      | DRB1*11:01            | 0.75            | Consensus (simm/nn/sturniolo) |
| 19   | 8b               | ALGKVLPPFHRWHTM<br>V | DRB5*01:01            | 0.79            | Consensus (simm/nn/sturniolo) |
| 20   | 9b               | VVPPALHLVDPQIQL      | DRB3*01:01            | 0.03            | Consensus (comb.lib./simm/nn) |
| 21   | Envelope         | NSVLLFLAFVVFLLV      | DPA1*01:03/DPB1*02:01 | 0.01            | Consensus (comb.lib./simm/nn) |
|      |                  |                      | DPA1*03:01/DPB1*04:02 | 0.01            | Consensus (comb.lib./simm/nn) |
|      |                  |                      | DPA1*01/DPB1*04:01    | 0.01            | Consensus (comb.lib./simm/nn) |
| 22   | Envelope         | SVLLFLAFVVFLLV       | DPA1*01:03/DPB1*02:01 | 0.01            | Consensus (comb.lib./simm/nn) |
|      |                  |                      | DPA1*03:01/DPB1*04:02 | 0.01            | Consensus (comb.lib./simm/nn) |
|      |                  |                      | DPA1*01/DPB1*04:01    | 0.01            | Consensus (comb.lib./simm/nn) |
| 23   | Envelope         | VLLFLAFVVFLLVTL      | DPA1*01:03/DPB1*02:01 | 0.01            | Consensus (comb.lib./simm/nn) |
|      |                  |                      | DPA1*03:01/DPB1*04:02 | 0.01            | Consensus (comb.lib./simm/nn) |
|      |                  |                      | DPA1*01/DPB1*04:01    | 0.01            | Consensus (comb.lib./simm/nn) |

|    |              |                 |                       |      |                               |
|----|--------------|-----------------|-----------------------|------|-------------------------------|
| 24 | Envelope     | LLFLAFVVFLVTLA  | DPA1*01:03/DPB1*02:01 | 0.01 | Consensus (comb.lib./simm/nn) |
|    |              |                 | DPA1*03:01/DPB1*04:02 | 0.01 | Consensus (comb.lib./simm/nn) |
|    |              |                 | DPA1*01/DPB1*04:01    | 0.01 | Consensus (comb.lib./simm/nn) |
| 25 | Envelope     | LFLAFVVFLVTLAI  | DPA1*01:03/DPB1*02:01 | 0.01 | Consensus (comb.lib./simm/nn) |
|    |              |                 | DPA1*03:01/DPB1*04:02 | 0.01 | Consensus (comb.lib./simm/nn) |
|    |              |                 | DPA1*01/DPB1*04:01    | 0.01 | Consensus (comb.lib./simm/nn) |
| 26 | Envelope     | FLAFVVFLVTLAIL  | DPA1*01:03/DPB1*02:01 | 0.01 | Consensus (comb.lib./simm/nn) |
|    |              |                 | DPA1*03:01/DPB1*04:02 | 0.01 | Consensus (comb.lib./simm/nn) |
|    |              |                 | DPA1*01/DPB1*04:01    | 0.01 | Consensus (comb.lib./simm/nn) |
| 27 | Envelope     | LAFVVFLVTLAILT  | DPA1*01:03/DPB1*02:01 | 0.01 | Consensus (comb.lib./simm/nn) |
|    |              |                 | DPA1*03:01/DPB1*04:02 | 0.01 | Consensus (comb.lib./simm/nn) |
|    |              |                 | DPA1*01/DPB1*04:01    | 0.01 | Consensus (comb.lib./simm/nn) |
| 28 | Membrane     | WNLVIGFLFLAWIML | DPA1*03:01/DPB1*04:02 | 0.01 | Consensus (comb.lib./simm/nn) |
|    |              |                 | DPA1*01/DPB1*04:01    | 0.01 | Consensus (comb.lib./simm/nn) |
| 29 | Membrane     | NLVIGFLFLAWIMLL | DPA1*03:01/DPB1*04:02 | 0.01 | Consensus (comb.lib./simm/nn) |
|    |              |                 | DPA1*01/DPB1*04:01    | 0.01 | Consensus (comb.lib./simm/nn) |
| 30 | Nucleocapsid | GTRNPNNNAATVLQL | DQA1*01:02/DQB1*06:02 | 0.01 | Consensus (comb.lib./simm/nn) |
| 31 | Spike        | MFIFLLFLTLTSGSD | DPA1*01:03/DPB1*02:01 | 0.01 | Consensus (comb.lib./simm/nn) |
|    |              |                 | DPA1*01/DPB1*04:01    | 0.01 | Consensus (comb.lib./simm/nn) |
| 32 | Spike        | GYQPYRVVLSFELL  | DPA1*01:03/DPB1*02:01 | 0.01 | Consensus (comb.lib./simm/nn) |
| 33 | Spike        | YQPYRVVLSFELLN  | DPA1*01:03/DPB1*02:01 | 0.01 | Consensus (comb.lib./simm/nn) |
| 34 | Spike        | QPYRVVLSFELLNA  | DPA1*01:03/DPB1*02:01 | 0.01 | Consensus (comb.lib./simm/nn) |
| 35 | Spike        | PYRVVLSFELLNAP  | DPA1*01:03/DPB1*02:01 | 0.01 | Consensus (comb.lib./simm/nn) |
| 36 | Spike        | YRVVLSFELLNAPA  | DPA1*01:03/DPB1*02:01 | 0.01 | Consensus (comb.lib./simm/nn) |

**Supplementary table S8. Homology modeling for HLA alleles.** Tertiary structure of HLA alleles were modeled by homology modeling using SwissModel server. Templates were chosen with highest sequence identity. Generated models with acceptable QMEAN value were chosen for further studies.

| S.No | HLA Class I Allele  | Template used for modeling | % sequence identity | QMEAN   |
|------|---------------------|----------------------------|---------------------|---------|
| 1    | A0201               | 2vlj.1.A                   | 100%                | -1.03   |
| 2    | A0203               | 3ox8.1.A                   | 100%                | -0.59   |
| 3    | A2301               | 2bck.1.A                   | 98.91%              | -0.01   |
| 4    | A2402               | 2bck.1.A                   | 100%                | -0.02   |
| 5    | B1501               | 5txs.1.A                   | 100%                | 0.14    |
| 6    | B3501               | 1a9b.1.A                   | 100%                | -0.60   |
| 7    | A0206               | 4l3c.11.A                  | 99.64%              | 0.02    |
| 8    | B4402               | 1m6o.1.A                   | 100%                | 0.75    |
| 9    | B4403               | 4jqx.1.A                   | 100%                | 0.64    |
| S.No | HLA Class II Allele | Template used for modeling | % sequence identity | QMEAN   |
| 1    | DPA-101             | 4p5m.3.A                   | 100%                | (-)1.45 |
| 2    | DPA1-0103           | 4p4r.1.A                   | 100%                | (-)0.73 |
| 3    | DPA1-0201           | 3wex.1.A                   | 99.45%              | (-)0.01 |
| 4    | DPB1-0401           | 4p57.1.B                   | 96.84%              | (-)0.88 |
| 5    | DRB1-0901           | 3pgd.1.B                   | 91.41%              | (-)0.44 |
| 6    | DPB1-0201           | 4p5m.1.B                   | 98.42%              | (-)0.37 |
| 7    | DRB1-1101           | 6atf.1.B                   | 96.32%              | 0.65    |

**Supplementary table S9. INF- $\gamma$  epitopes from CTL and HTL MEVs.** INF- $\gamma$  inducing (POSITIVE) epitopes from CTL and HTL MEVs were screened by using “Motif and SVM hybrid” (MERCİ & SVM) approaches.

| CLT Epitopes also predicted to be IFN-gamma epitopes |           |                   |        |          |       |
|------------------------------------------------------|-----------|-------------------|--------|----------|-------|
| S.No                                                 | Start-END | Sequence          | Method | Result   | Score |
| 1                                                    | 68-82     | RWANQCIFGHSPRQQ   | MERCİ  | POSITIVE | 2     |
| 2                                                    | 69-83     | WANQCIFGHSPRQQR   | MERCİ  | POSITIVE | 2     |
| 3                                                    | 70-84     | ANQCIFGHSPRQQRE   | MERCİ  | POSITIVE | 2     |
| 4                                                    | 71-85     | NQCIFGHSPRQQREG   | MERCİ  | POSITIVE | 2     |
| 5                                                    | 72-86     | QCIFGHSPRQQREGV   | MERCİ  | POSITIVE | 2     |
| 6                                                    | 84-98     | EGVGENVYAYWSSVS   | MERCİ  | POSITIVE | 1     |
| 7                                                    | 85-99     | GVGENVYAYWSSVS    | MERCİ  | POSITIVE | 2     |
| 8                                                    | 121-135   | LYENNPSNNMTWKVA   | MERCİ  | POSITIVE | 1     |
| 9                                                    | 122-136   | YENNPSNNMTWKVAG   | MERCİ  | POSITIVE | 1     |
| 10                                                   | 123-137   | ENNPSNNMTWKVAGQ   | MERCİ  | POSITIVE | 2     |
| 11                                                   | 124-138   | NNPSNNMTWKVAGQG   | MERCİ  | POSITIVE | 2     |
| 12                                                   | 125-139   | NPSNNMTWKVAGQGV   | MERCİ  | POSITIVE | 1     |
| 13                                                   | 126-140   | PSNNMTWKVAGQGV    | MERCİ  | POSITIVE | 1     |
| 14                                                   | 127-141   | SNNMTWKVAGQGV     | MERCİ  | POSITIVE | 1     |
| 15                                                   | 206-220   | SALTCTSTHFGGGS    | MERCİ  | POSITIVE | 3     |
| 16                                                   | 290-304   | GGSMWLSYFVASFGG   | MERCİ  | POSITIVE | 1     |
| 17                                                   | 291-305   | GSMWLSYFVASFGGG   | MERCİ  | POSITIVE | 1     |
| 18                                                   | 292-306   | SMWLSYFVASFGGGG   | MERCİ  | POSITIVE | 1     |
| 19                                                   | 317-331   | FGGGGSAQFAPSASA   | SVM    | POSITIVE | 1.4   |
| 20                                                   | 318-332   | GGGGSAQFAPSASAF   | SVM    | POSITIVE | 1.3   |
| 21                                                   | 319-333   | GGGSAQFAPSASAFG   | SVM    | POSITIVE | 1.2   |
| 22                                                   | 320-334   | GGSAQFAPSASAFGG   | SVM    | POSITIVE | 1.2   |
| 23                                                   | 321-335   | GSAQFAPSASAFGGG   | SVM    | POSITIVE | 1.2   |
| 24                                                   | 322-336   | SAQFAPSASAFGGGG   | SVM    | POSITIVE | 1.3   |
| 25                                                   | 338-352   | TPSGTWLTYGGGGSL   | SVM    | POSITIVE | 1     |
| 26                                                   | 339-353   | PSGTWLTYYGGGSLT   | SVM    | POSITIVE | 1.1   |
| 27                                                   | 391-405   | GGGSLYNSTFFSTFG   | MERCİ  | POSITIVE | 1     |
| 28                                                   | 392-406   | GGSLYNSTFFSTFGG   | MERCİ  | POSITIVE | 1     |
| 29                                                   | 403-417   | TFGGGGSSTFFSTFK   | MERCİ  | POSITIVE | 1     |
| 30                                                   | 404-418   | FGGGGSSTFFSTFKC   | MERCİ  | POSITIVE | 1     |
| 31                                                   | 405-419   | GGGGSSTFFSTFKCY   | MERCİ  | POSITIVE | 1     |
| 32                                                   | 406-420   | GGGSSTFFSTFKCYG   | MERCİ  | POSITIVE | 1     |
| 33                                                   | 407-421   | GGSTFFSTFKCYGG    | MERCİ  | POSITIVE | 1     |
| 34                                                   | 408-421   | GSSTFFSTFKCYGGG   | MERCİ  | POSITIVE | 1     |
| 35                                                   | 409-423   | SSTFFSTFKCYGGGG   | MERCİ  | POSITIVE | 1     |
| 36                                                   | 410-424   | STFFSTFKCYGGGGS   | MERCİ  | POSITIVE | 1     |
| 37                                                   | 461-475   | NVFGGGGSLGADSSI   | SVM    | POSITIVE | 1.1   |
| 38                                                   | 462-476   | VFGGGGSLGADSSIA   | SVM    | POSITIVE | 1.2   |
| 39                                                   | 464-478   | GGGGSLGADSSIAYG   | SVM    | POSITIVE | 1.1   |
| 40                                                   | 465-479   | GGGSLGADSSIAYGG   | SVM    | POSITIVE | 1.1   |
| 41                                                   | 466-480   | GGSLGADSSIAYGGG   | SVM    | POSITIVE | 1.1   |
| 42                                                   | 467-481   | GSLGADSSIAYGGGG   | SVM    | POSITIVE | 1.1   |
| 43                                                   | 468-482   | SLGADSSIAYGGGGS   | SVM    | POSITIVE | 1.1   |
| 44                                                   | 542-556   | PFAMQMAYGGGGSF    | SVM    | POSITIVE | 1.2   |
| 45                                                   | 543-557   | FAMQMAYGGGGSFAM   | SVM    | POSITIVE | 1.2   |
| 46                                                   | 544-558   | AMQMAYGGGGSFAMQ   | SVM    | POSITIVE | 1.1   |
| 47                                                   | 545-559   | MQMAYGGGGSFAMQM   | SVM    | POSITIVE | 1     |
| 48                                                   | 546-560   | QMAYGGGGSFAMQMA   | SVM    | POSITIVE | 1.1   |
| 49                                                   | 647-661   | MAYGGGGSFAMQMAY   | SVM    | POSITIVE | 1     |
| 50                                                   | 548-562   | AYGGGGSFAMQMAYR   | SVM    | POSITIVE | 1.1   |
| 51                                                   | 570-584   | YFPREGVFVFGGGGS   | SVM    | POSITIVE | 1     |
| 52                                                   | 571-585   | FPREGVFVFGGGGSF   | SVM    | POSITIVE | 1     |
| 53                                                   | 572-586   | PREGVFVFGGGGSFP   | SVM    | POSITIVE | 1     |
| 54                                                   | 573-587   | REGVFVFGGGGSFPR   | SVM    | POSITIVE | 1     |
| 55                                                   | 574-588   | EGVFVFGGGGSFPRE   | SVM    | POSITIVE | 1     |
| 56                                                   | 575-589   | GVVFVFGGGGSFPREG  | SVM    | POSITIVE | 1     |
| 57                                                   | 576-590   | VVFVFGGGGSFPREGV  | SVM    | POSITIVE | 1     |
| 58                                                   | 577-591   | FVFVFGGGGSFPREGVF | SVM    | POSITIVE | 1     |

| 59                                                          | 578-592   | VFGGGGSFPREGVVFV  | SVM    | POSITIVE | 1     |
|-------------------------------------------------------------|-----------|-------------------|--------|----------|-------|
| 60                                                          | 579-593   | FGGGGSFPREGVVFV   | SVM    | POSITIVE | 1     |
| 61                                                          | 580-594   | GGGGSFPRREGVVFVG  | SVM    | POSITIVE | 1     |
| 62                                                          | 581-595   | GGGSFPREGVVFVFGG  | SVM    | POSITIVE | 1     |
| 63                                                          | 582-596   | GGSFPRREGVVFVFGGG | SVM    | POSITIVE | 1     |
| 64                                                          | 583-597   | GSFPREGVVFVFGGGG  | SVM    | POSITIVE | 1     |
| 65                                                          | 584-598   | SFPREGVVFVFGGGGS  | SVM    | POSITIVE | 1     |
| 66                                                          | 585-599   | FPREGVVFVFGGGGSK  | SVM    | POSITIVE | 1     |
| 67                                                          | 587-601   | REGVVFVFGGGGSKWP  | SVM    | POSITIVE | 1     |
| 68                                                          | 588-602   | EGVVFVFGGGGSKWPW  | SVM    | POSITIVE | 1.1   |
| <b>HLT Epitopes also predicted to be IFN-gamma epitopes</b> |           |                   |        |          |       |
| S.No                                                        | Start-END | Sequence          | Method | Result   | Score |
| 1                                                           | 68-82     | RWANQCIFGHSPRQQ   | MERCI  | POSITIVE | 2     |
| 2                                                           | 69-83     | WANQCIFGHSPRQQR   | MERCI  | POSITIVE | 2     |
| 3                                                           | 70-84     | ANQCIFGHSPRQQRE   | MERCI  | POSITIVE | 2     |
| 4                                                           | 71-85     | NQCIFGHSPRQQREG   | MERCI  | POSITIVE | 2     |
| 5                                                           | 72-86     | QCIFGHSPRQQREGV   | MERCI  | POSITIVE | 2     |
| 6                                                           | 83-98     | EGVGENVYAYWSSVS   | MERCI  | POSITIVE | 1     |
| 7                                                           | 84-99     | GVGENVYAYWSSVSV   | MERCI  | POSITIVE | 2     |
| 8                                                           | 121-135   | LYENNPSNNMTWKVA   | MERCI  | POSITIVE | 1     |
| 9                                                           | 122-136   | YENNPSNNMTWKVAG   | MERCI  | POSITIVE | 1     |
| 10                                                          | 123-137   | ENNPSNNMTWKVAGQ   | MERCI  | POSITIVE | 2     |
| 11                                                          | 124-138   | NNPSNNMTWKVAGQG   | MERCI  | POSITIVE | 2     |
| 12                                                          | 125-139   | NPSNNMTWKVAGQGV   | MERCI  | POSITIVE | 1     |
| 13                                                          | 126-140   | PSNNMTWKVAGQGV    | MERCI  | POSITIVE | 1     |
| 14                                                          | 127-141   | SNNMTWKVAGQGV     | MERCI  | POSITIVE | 1     |
| 15                                                          | 239-253   | VFLILCGGGGSLFLI   | SVM    | POSITIVE | 1     |
| 16                                                          | 541-549   | QIQLGGGGG         | SVM    | POSITIVE | 1.1   |
| 17                                                          | 553-567   | LLFLAFVVFLLVGGG   | SVM    | POSITIVE | 1     |
| 18                                                          | 554-568   | LFLAFVVFLLVGGGG   | SVM    | POSITIVE | 1     |
| 19                                                          | 555-569   | FLAFVVFLLVGGGGGS  | SVM    | POSITIVE | 1.1   |
| 20                                                          | 556-570   | LAFVVFLLVGGGGSS   | SVM    | POSITIVE | 1.1   |
| 21                                                          | 573-587   | LFLAFVVFLLVTTGGG  | MERCI  | POSITIVE | 1     |
| 22                                                          | 596-610   | FVVFLLVTLGGGGSL   | SVM    | POSITIVE | 1     |
| 23                                                          | 597-611   | VVFLLVTLGGGGSL    | SVM    | POSITIVE | 1.2   |
| 24                                                          | 604-618   | LGGGSLFLAFVVF     | SVM    | POSITIVE | 1     |
| 25                                                          | 605-619   | GGGSLFLAFVVFL     | SVM    | POSITIVE | 1.1   |
| 26                                                          | 606-620   | GGGSLFLAFVVFL     | SVM    | POSITIVE | 1     |
| 27                                                          | 625-639   | GGGSLFLAFVVFL     | SVM    | POSITIVE | 1     |
| 28                                                          | 643-657   | AIGGGSLAFVVFL     | SVM    | POSITIVE | 1     |
| 29                                                          | 644-658   | IGGGSLAFVVFL      | SVM    | POSITIVE | 1.1   |
| 30                                                          | 645-659   | GGGSLAFVVFLV      | SVM    | POSITIVE | 1.1   |
| 31                                                          | 662-676   | AILGGGSLAFVVFL    | SVM    | POSITIVE | 1     |

**Supplementary table S10. Refinement models of CTL and HTL MEVs.** CTL and HTL MEVs models were refined by GalaxyWEB server and used for further studies. After refinement in particular Rama favored residues increased significantly.

| <b>Galaxy Refinement for CTL MEV</b> |        |       |           |             |                   |              |
|--------------------------------------|--------|-------|-----------|-------------|-------------------|--------------|
| Model                                | GDT-HA | RMSD  | MolProbit | Clash score | Poor rotaSARS-CoV | Rama favored |
| <b>Initial</b>                       | 1.00   | 0.00  | 3.051     | 103.4       | 1.2               | 91.1         |
| MODEL 1                              | 0.9457 | 0.425 | 2.326     | 26.5        | 0.9               | 93.7         |
| <b>Galaxy Refinement for HTL MEV</b> |        |       |           |             |                   |              |
| <b>Initial</b>                       | 1.00   | 0.00  | 3.216     | 120.6       | 1.9               | 92.5         |
| MODEL 1                              | 0.9447 | 0.430 | 2.377     | 27.3        | 1.4               | 95.0         |

**Supplementary table S11. B Cell discontinuous epitopes of CTL & HTL MEVs.**  
Discontinuous B Cell epitopes predicted by ElliPro (IEDB) from CTL & HTL MEVs.

| CTL MEV Discontinuous epitopes residues |                                                                                                                                                                                                                                                                                                                                                                                                                                                                                                                                                                                                                                                                                                                                                                                                                                                                                                                                                                                                                                                                                                      |                    |       |
|-----------------------------------------|------------------------------------------------------------------------------------------------------------------------------------------------------------------------------------------------------------------------------------------------------------------------------------------------------------------------------------------------------------------------------------------------------------------------------------------------------------------------------------------------------------------------------------------------------------------------------------------------------------------------------------------------------------------------------------------------------------------------------------------------------------------------------------------------------------------------------------------------------------------------------------------------------------------------------------------------------------------------------------------------------------------------------------------------------------------------------------------------------|--------------------|-------|
| S.No                                    | Residues                                                                                                                                                                                                                                                                                                                                                                                                                                                                                                                                                                                                                                                                                                                                                                                                                                                                                                                                                                                                                                                                                             | Number of residues | Score |
| 1                                       | G449, G450, G451, G452, S453, R454, I455, Y456                                                                                                                                                                                                                                                                                                                                                                                                                                                                                                                                                                                                                                                                                                                                                                                                                                                                                                                                                                                                                                                       | 8                  | 0.861 |
| 2                                       | G464, G465, G466, G467, S468, L469, G470, A471, D472, S473, S474, I475, A476, Y477, G478, G479, G480, G481, S482, R483, S484, F485, I486, E487, D488, L489, L490, F491, G492, G493, G494, G495, S496, L497, L498, T499, D500, D501, M502, I503, A504, A505, Y506, G507, G508, G509, G510, S511, L512, T513, D514, D515, M516, I517, A518, A519, Y520, G521, G522, G523, G524, S525, Q526, I527, P528, F529, A530, M531, Q532, M533, A534, Y535, G536, G537, G538, G539, S540, I541, P542, F543, A544, M545, Q546, M547, A548, Y549, G550, G551, G552, G553, S554, F555, A556, M557, Q558, M559, A560, Y561, R562, F563, G564, G565, G566, G567, S568, A569, Y570, F571, P572, R573, E574, G575, V576, F577, V578, F579, G580, G581, G582, G583, S584, F585, P586, E588, G589, V590, F591, V592, F593, G594, G595, G596, G597, S598, K599, W600, P601, W602, Y603, V604, W605, L606                                                                                                                                                                                                                   | 142                | 0.799 |
| 3                                       | S457, T458, G459, N460, N461, V462, F463                                                                                                                                                                                                                                                                                                                                                                                                                                                                                                                                                                                                                                                                                                                                                                                                                                                                                                                                                                                                                                                             | 7                  | 0.782 |
| 4                                       | I1, V2, V3, A4, V5, T6, G7, Y8, N9, C10, P11, G12, G13, K14, L15, T16, A17, L18, E19, R20, K21, K22, W58, D59, C60, K61, E63, S64, S65, A66, Q67, R68, W69, A70, N71, Q72, C73, I74, F75, G76, H77, S78, P79, R80, Q82, R83, E88, N89, V90, Y91, A92, Y93, W94, S95, S96, V97, S98, V99, E100, G101, L102, K103, K104, T105, A106, L155                                                                                                                                                                                                                                                                                                                                                                                                                                                                                                                                                                                                                                                                                                                                                              | 66                 | 0.684 |
| 5                                       | D33, N36, G37, K38, L39, K40, N41, R42, N43, G44, T45, Y46, M47, P48, R49, G50, K51, M53, S116, K117, L118, P119, K120, L121, Y122, E123, N124, N125, P126, S127, N128, N129, M130, T131, W132, K133, V134, A135, G136, Q137, G138, V139, L140, S163, L165, Y166, A167, L168, I169, Y170, F171, L172, G173, G174, G175, G176, S177, S178, L179, S184, P185, K186, F187, G188, G189, G190                                                                                                                                                                                                                                                                                                                                                                                                                                                                                                                                                                                                                                                                                                             | 66                 | 0.624 |
| 6                                       | G405, G406, G407, G408, G433, F434, G435, G436, G437, G438, S439, W440, P441, L442, N443, D444, Y445, G446, F447, Y448                                                                                                                                                                                                                                                                                                                                                                                                                                                                                                                                                                                                                                                                                                                                                                                                                                                                                                                                                                               | 20                 | 0.62  |
| 7                                       | G218, G219, S220, T221, L222, I223, D224, F225                                                                                                                                                                                                                                                                                                                                                                                                                                                                                                                                                                                                                                                                                                                                                                                                                                                                                                                                                                                                                                                       | 8                  | 0.527 |
| HTL MEV Discontinuous epitopes residues |                                                                                                                                                                                                                                                                                                                                                                                                                                                                                                                                                                                                                                                                                                                                                                                                                                                                                                                                                                                                                                                                                                      |                    |       |
| S.No                                    | Residues                                                                                                                                                                                                                                                                                                                                                                                                                                                                                                                                                                                                                                                                                                                                                                                                                                                                                                                                                                                                                                                                                             | Number of residues | Score |
| 1                                       | I1, V2, V3, A4, V5, T6, G7, Y8, N9, C10, P11, G12, G13, K14, L15, T16, A17, L18, E19, R20, L56, T57, W58, D59, C60, K61, L62, E63, S64, S65, A66, Q67, R68, W69, A70, N71, Q72, C73, I74, F75, G76, H77, S78, P79, Q81, Q82, R83, E84, G85, V86, G87, E88, N89, V90, Y91, A92, Y93, W94, S95, S96, V97, S98, V99, E100, G101, L102, K103, K104, T105, A106, G107, T108, D109, A110, K112, S113, W114, S116, K117, L118, P119, K120, L121, Y122, E123, N124, N125, P126, S127, N128, N129, M130, T131, W132, K133, V134, A135, G136, Q137, G138, V139, L140, H141, Q144, A147, Y154, L155, Y156, A157, L158, I159, Y160, F161, L162, Q163, C164, G165, G166, G167, G168, S169, Q170, F171, L172, Y173, L174, Y175, A176, L177, I178, Y179, F180, C183, I184, G185, G186, G187, G188, S189, T190, M191, S192, K200, F201, T202, T203, S204, G205, G730, T731, R732, N733, L759, T760, S761, G762, S763, D764, G765, G766, G767, G768, S769, G770, Y771, Q772, P773, Y774, L803, N804, G805, G806, G807, G808, S809, Q810, P811, Y812, R813, L841, N842, A843, P844, G845, G846, G847, G848, S849, Y850 | 189                | 0.76  |
| 2                                       | L300, F302, T303, I304, G305, V383, L384, G385, G386, G387, G388, S389, F390, L444, G445, G446, G447, G448, S449, C450, F451, L452, A453, F454, L456, F457, L460, I464, G465, G466, G467, G468, S469, F470, L471, A472, F473, L474, L475, F476, L477, V478, L479, I480, M481, L482, I483, I484, G485, G486, G487, G488, S489, M490, K491, L492, L493, I494, V495, L496, T497, C498, I499, S500, L501, C502, S503, C504, G505, G506, G507, G508, S509, A510, P540, Q541, I542, Q543, L544, G545, G546, G547, G548, S549, V552, L553, F555, L556, A557, V559, V560, F561, L562, L563, V564, G565, G566, G567, G568                                                                                                                                                                                                                                                                                                                                                                                                                                                                                     | 99                 | 0.698 |
| 3                                       | L241, I242, L243, C244, G245, G246, G247, G248, S249, L250, F251, L252, I253, V254, A255, A256, L257, V258, F259, L262, C263, F264, G265, G266, G267, G268, S269, F270, L271, I272, V273, G327, G328, S329, L330, I331, D332, F333, Y334, L335, C336, F337, L338, A339, F340, L341, L342, F343, L344, G345, G346, G347, G348, S349, I350, F352, A358, L360, L361, F362, L363, V364, G365, G366, G367, Y410, L411, C412, H521, T522, M523, V524, G525, G526, G527, G528, S529, V530, V531, P532, P533, A534, L535, H536, L537, L591, L594, A595, F596, V597, V598, F599, L600, L601, V602, T603, L604, G605, G606, G607, G608, S609, L610, L611, L613, L664, G665, G666, G667, G668, S669, F672, V673, V674, F675, L676, L677, V678, T679, L680, A681, I682, L683, T684, G685, G686, G687, G688, S689, W690, N691, L692, V693, I694, G695, F696, L697, F698, L699, A700, W701, I702, G705, G706, G708                                                                                                                                                                                                 | 145                | 0.682 |
| 4                                       | G405, G406, G407, G408, S409, F413, L414, F416, F517                                                                                                                                                                                                                                                                                                                                                                                                                                                                                                                                                                                                                                                                                                                                                                                                                                                                                                                                                                                                                                                 | 9                  | 0.668 |
| 5                                       | G747, G748, S789, Y790, Q791, P792, Y793, L822, N823, A824, G827, G828, S829, P830, Y831, S856, F857, E858, L859, L860, N861, A862, P863, A864                                                                                                                                                                                                                                                                                                                                                                                                                                                                                                                                                                                                                                                                                                                                                                                                                                                                                                                                                       | 24                 | 0.536 |
| 6                                       | N41, R42, N43, G44, T45                                                                                                                                                                                                                                                                                                                                                                                                                                                                                                                                                                                                                                                                                                                                                                                                                                                                                                                                                                                                                                                                              | 5                  | 0.533 |

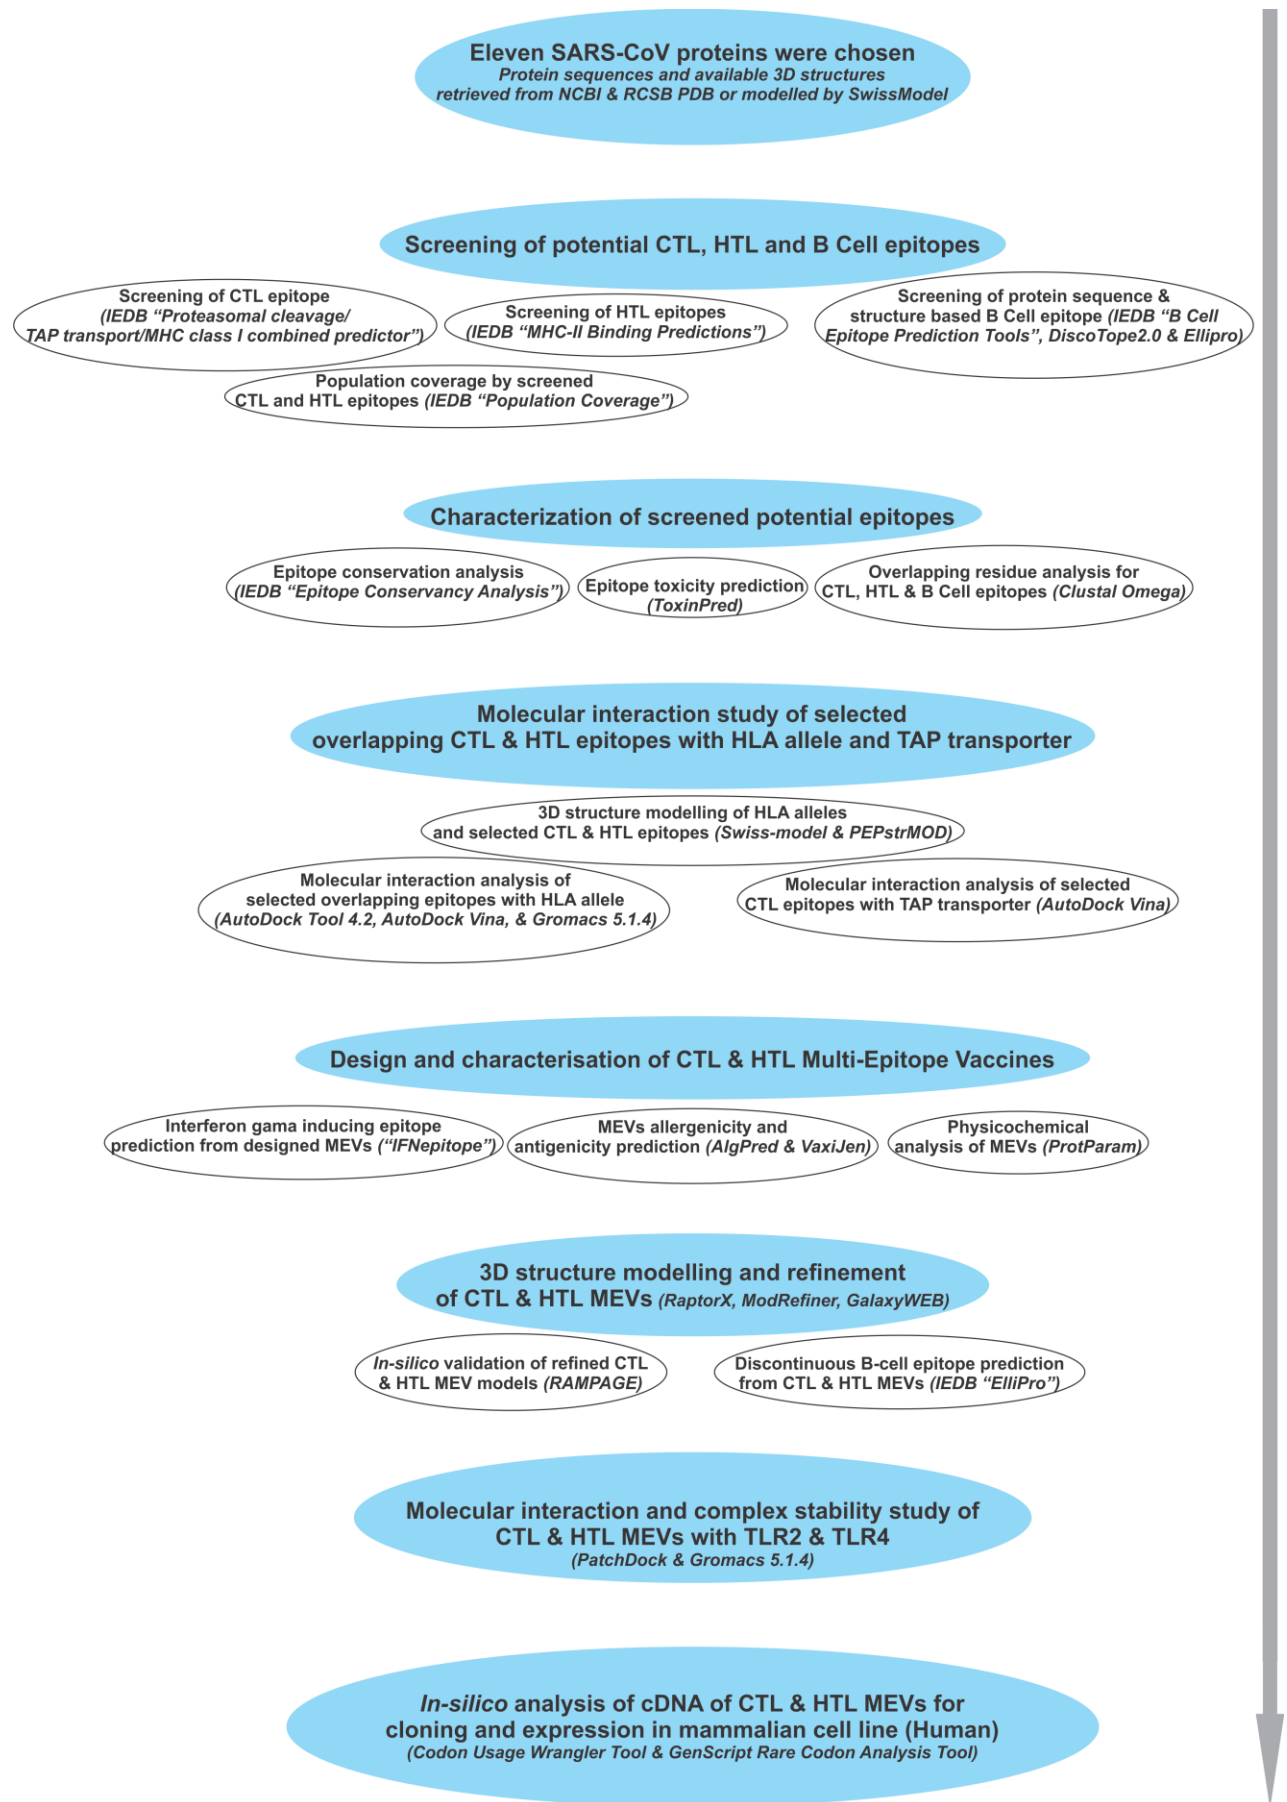

**Supplementary figure S1.** Workflow chart.

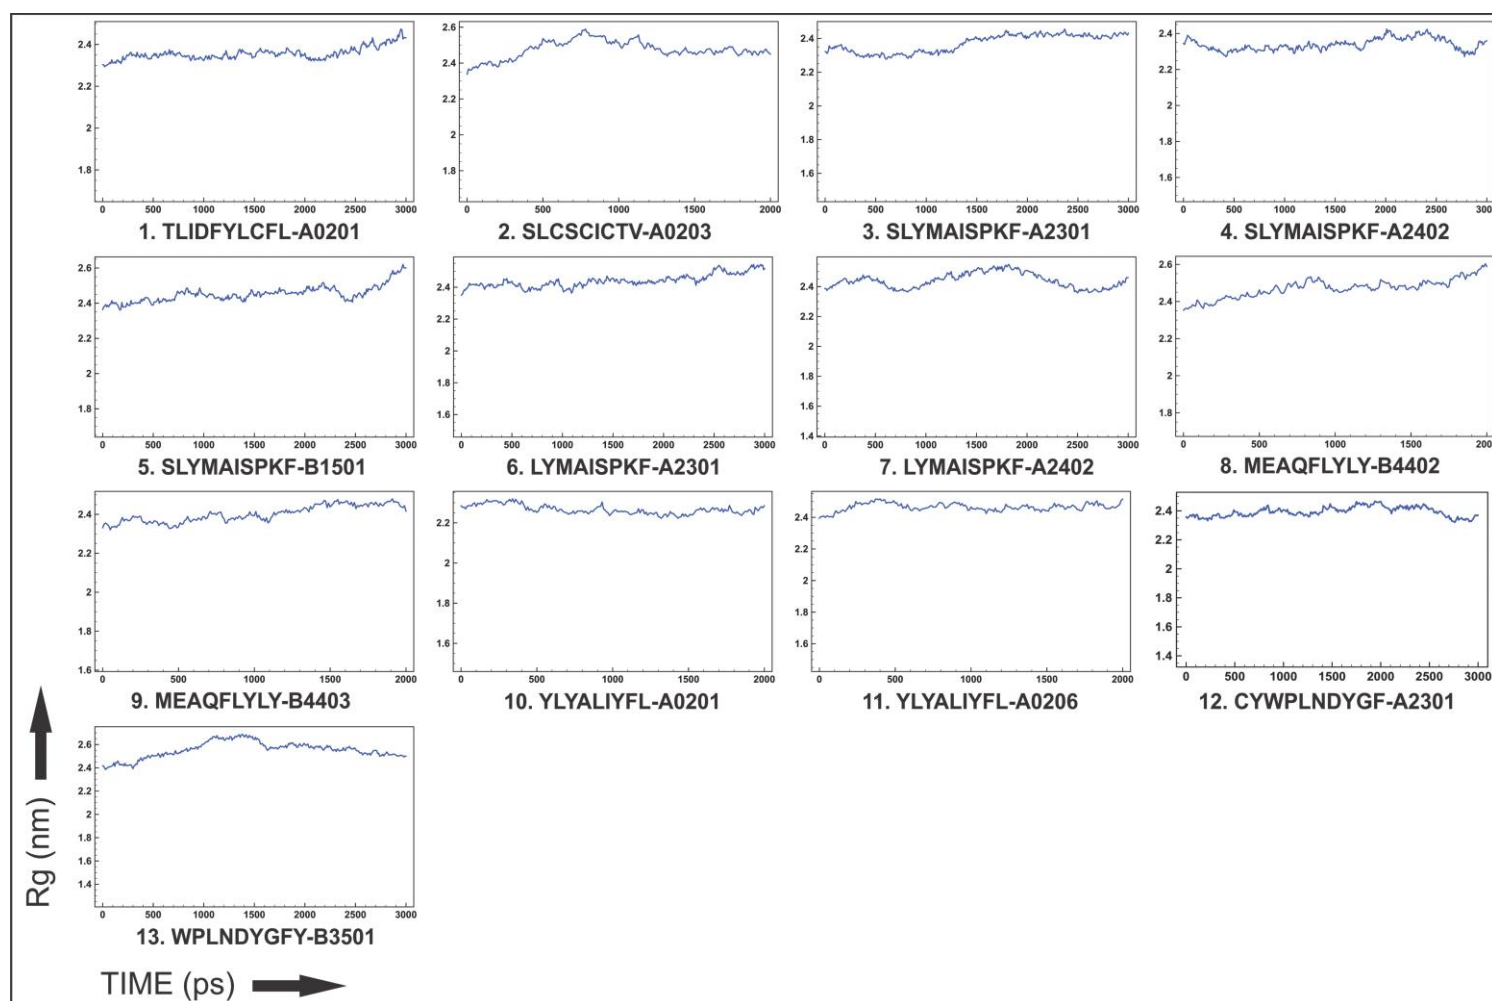

**Supplementary figure S2 (A).** The radius of gyration (Rg) across the time window of 3 ns for CTL epitope & HLA class I allele complexes.

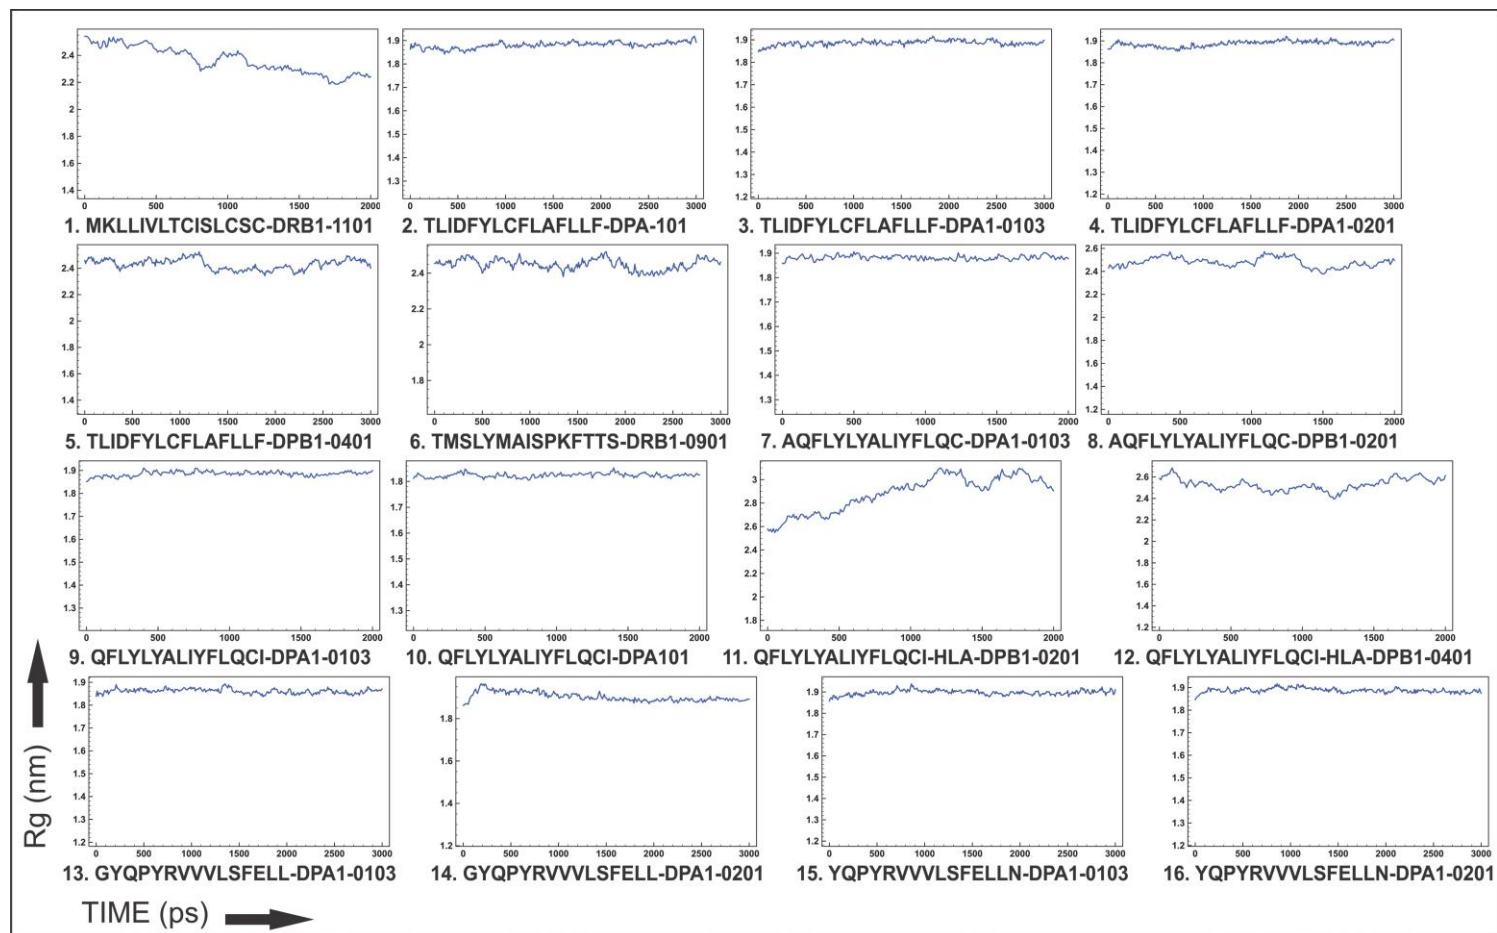

**Supplementary figure S2 (B).** The radius of gyration ( $R_g$ ) across the time window of 3 ns for HTL epitope & HLA class II allele complexes.



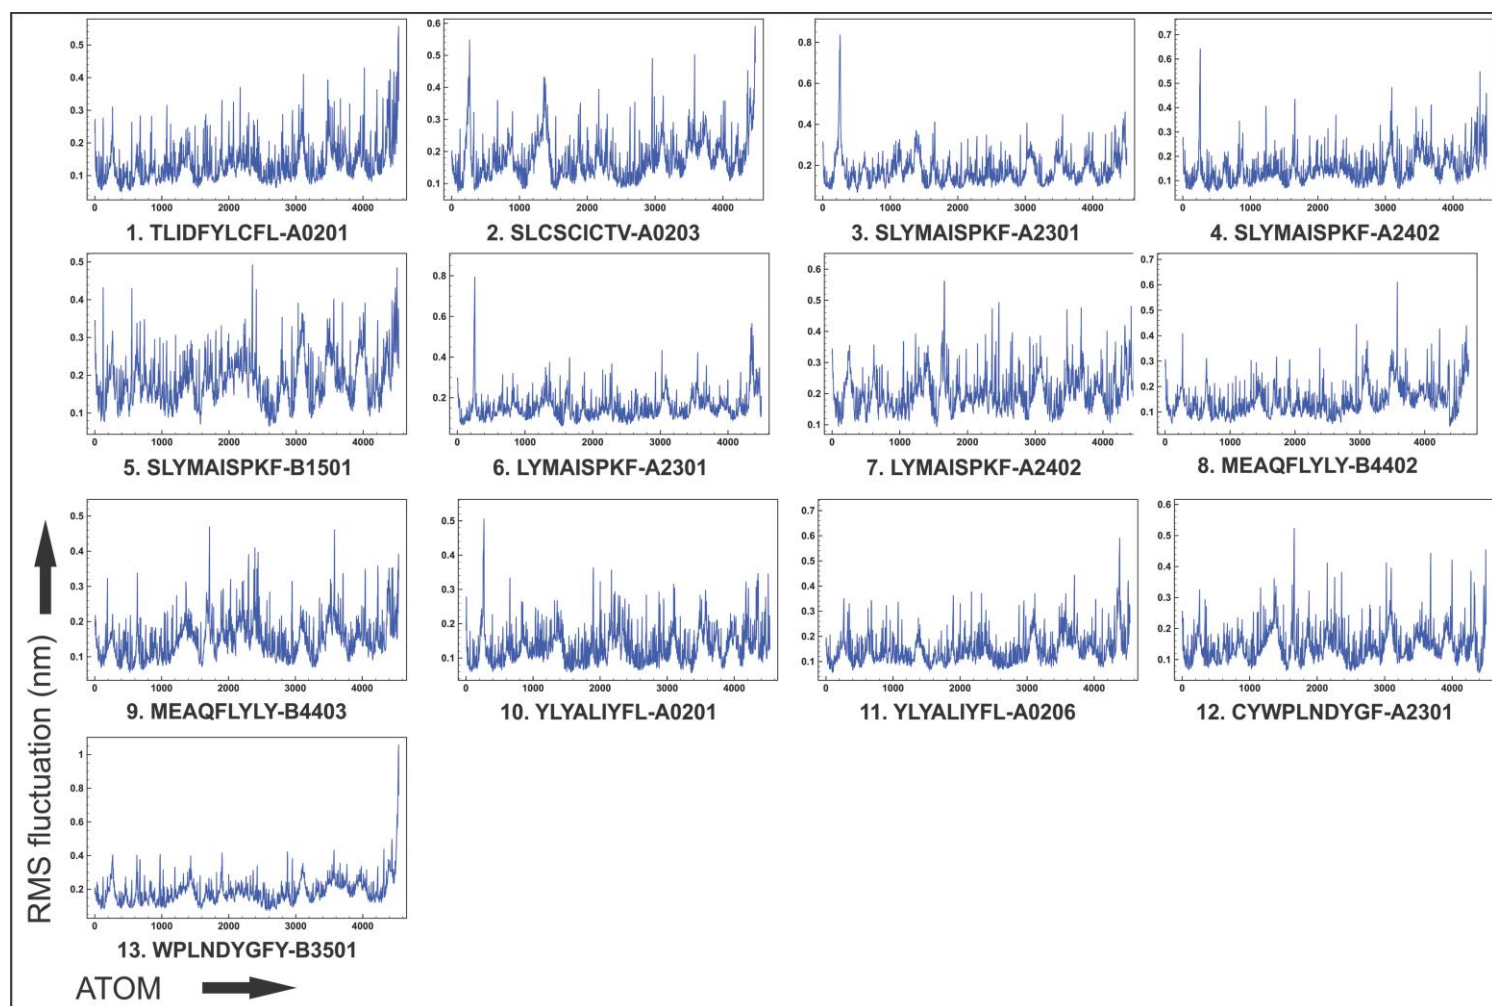

**Supplementary figure S3 (A).** RMS fluctuation (nanometers) for all the atoms of CTL epitope & HLA class I allele complexes.

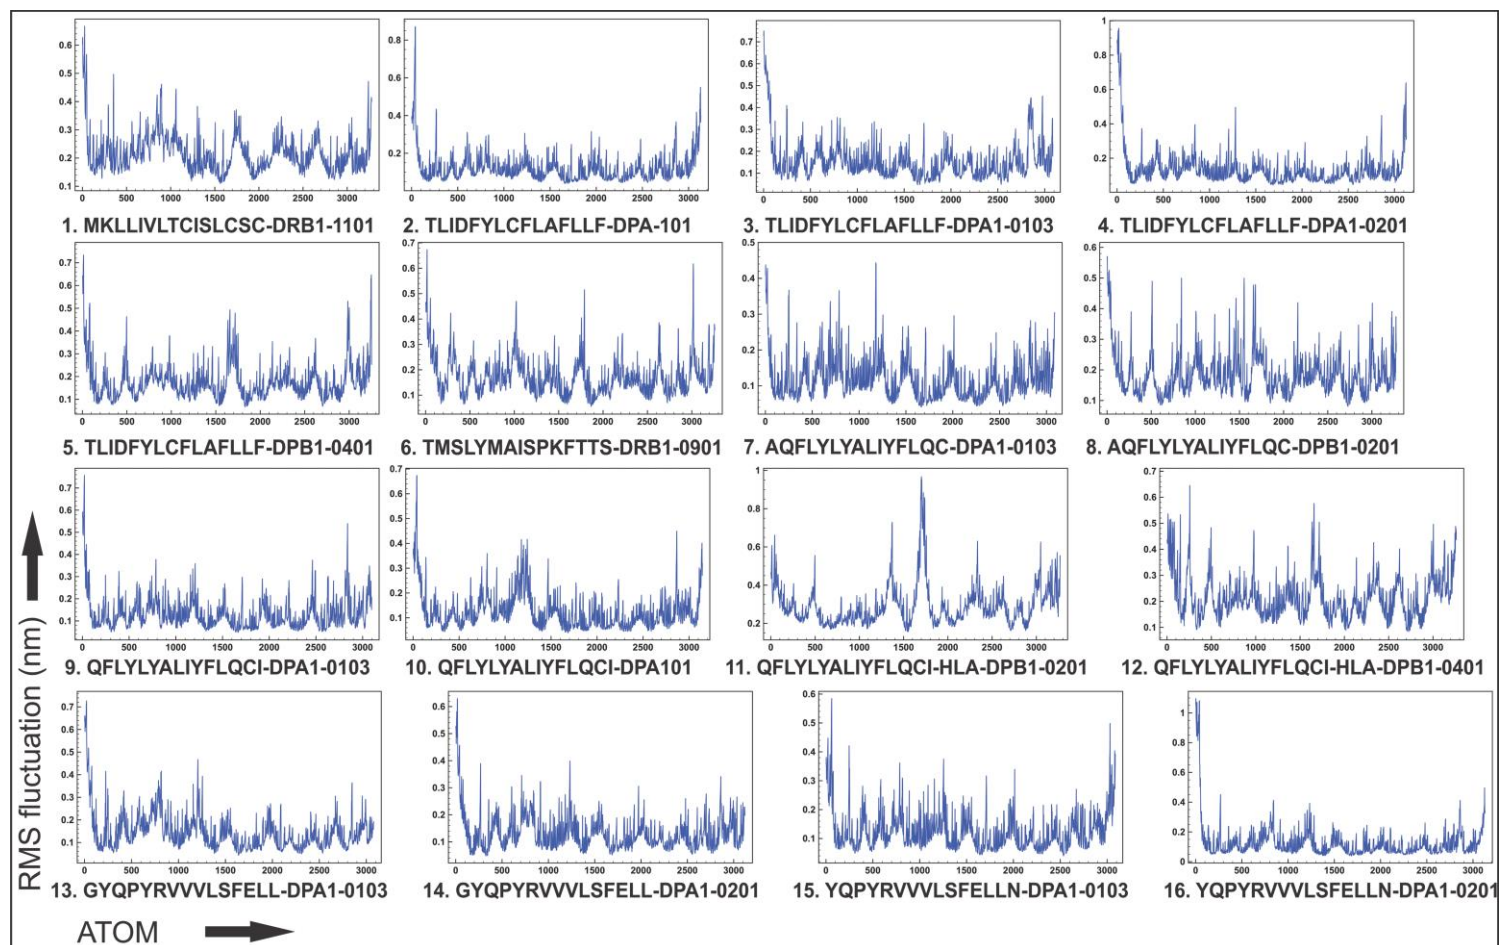

**Supplementary figure S3 (B).** RMS fluctuation (nanometers) for all the atoms of HTL epitope & HLA class II allele complexes.

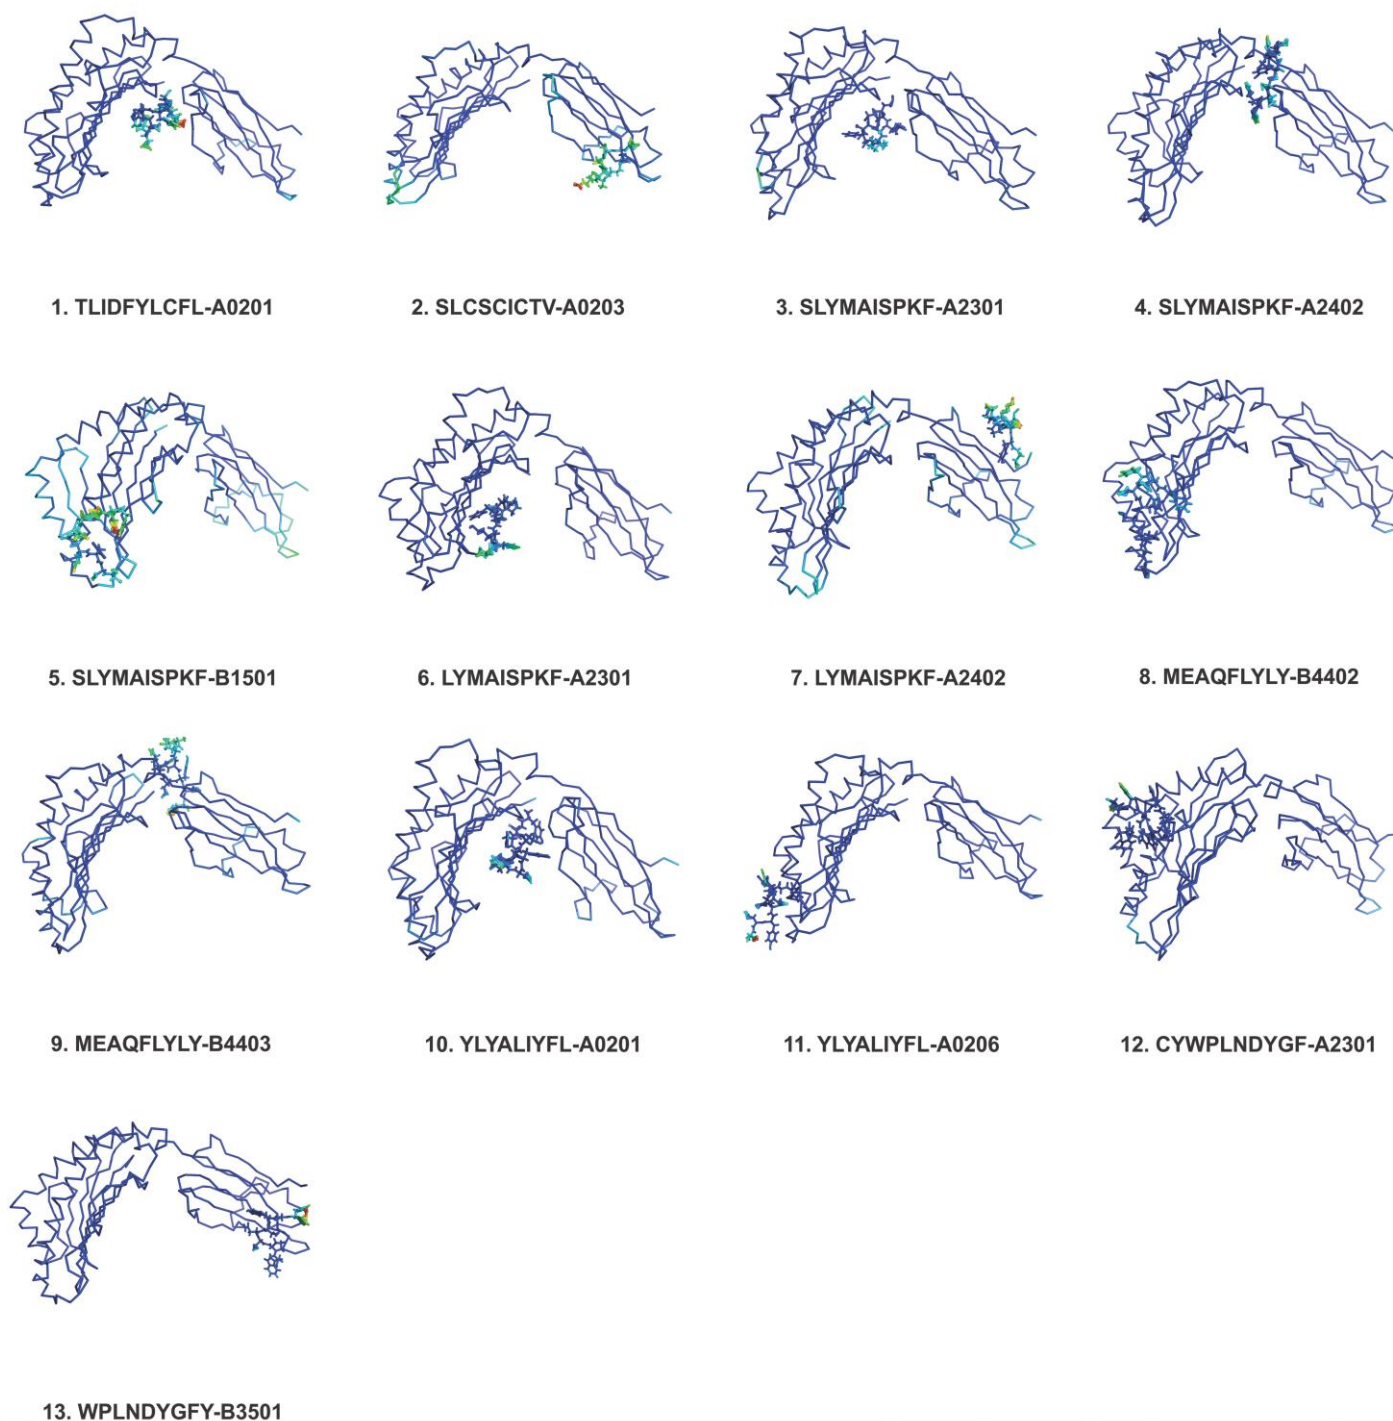

**Supplementary figure S4 (A).** B-Factor of CTL epitope & HLA class I allele complexes.

Epitopes are shown in sticks and HLA Class I alleles are shown in cartoons. The regions of complexes are shown in rainbow (VIBGYOR), the regions in blue being very stable and the



region towards red being relatively unstable. In the complexes shown above, most of the regions are in blue indicating the complexes to be highly stable.

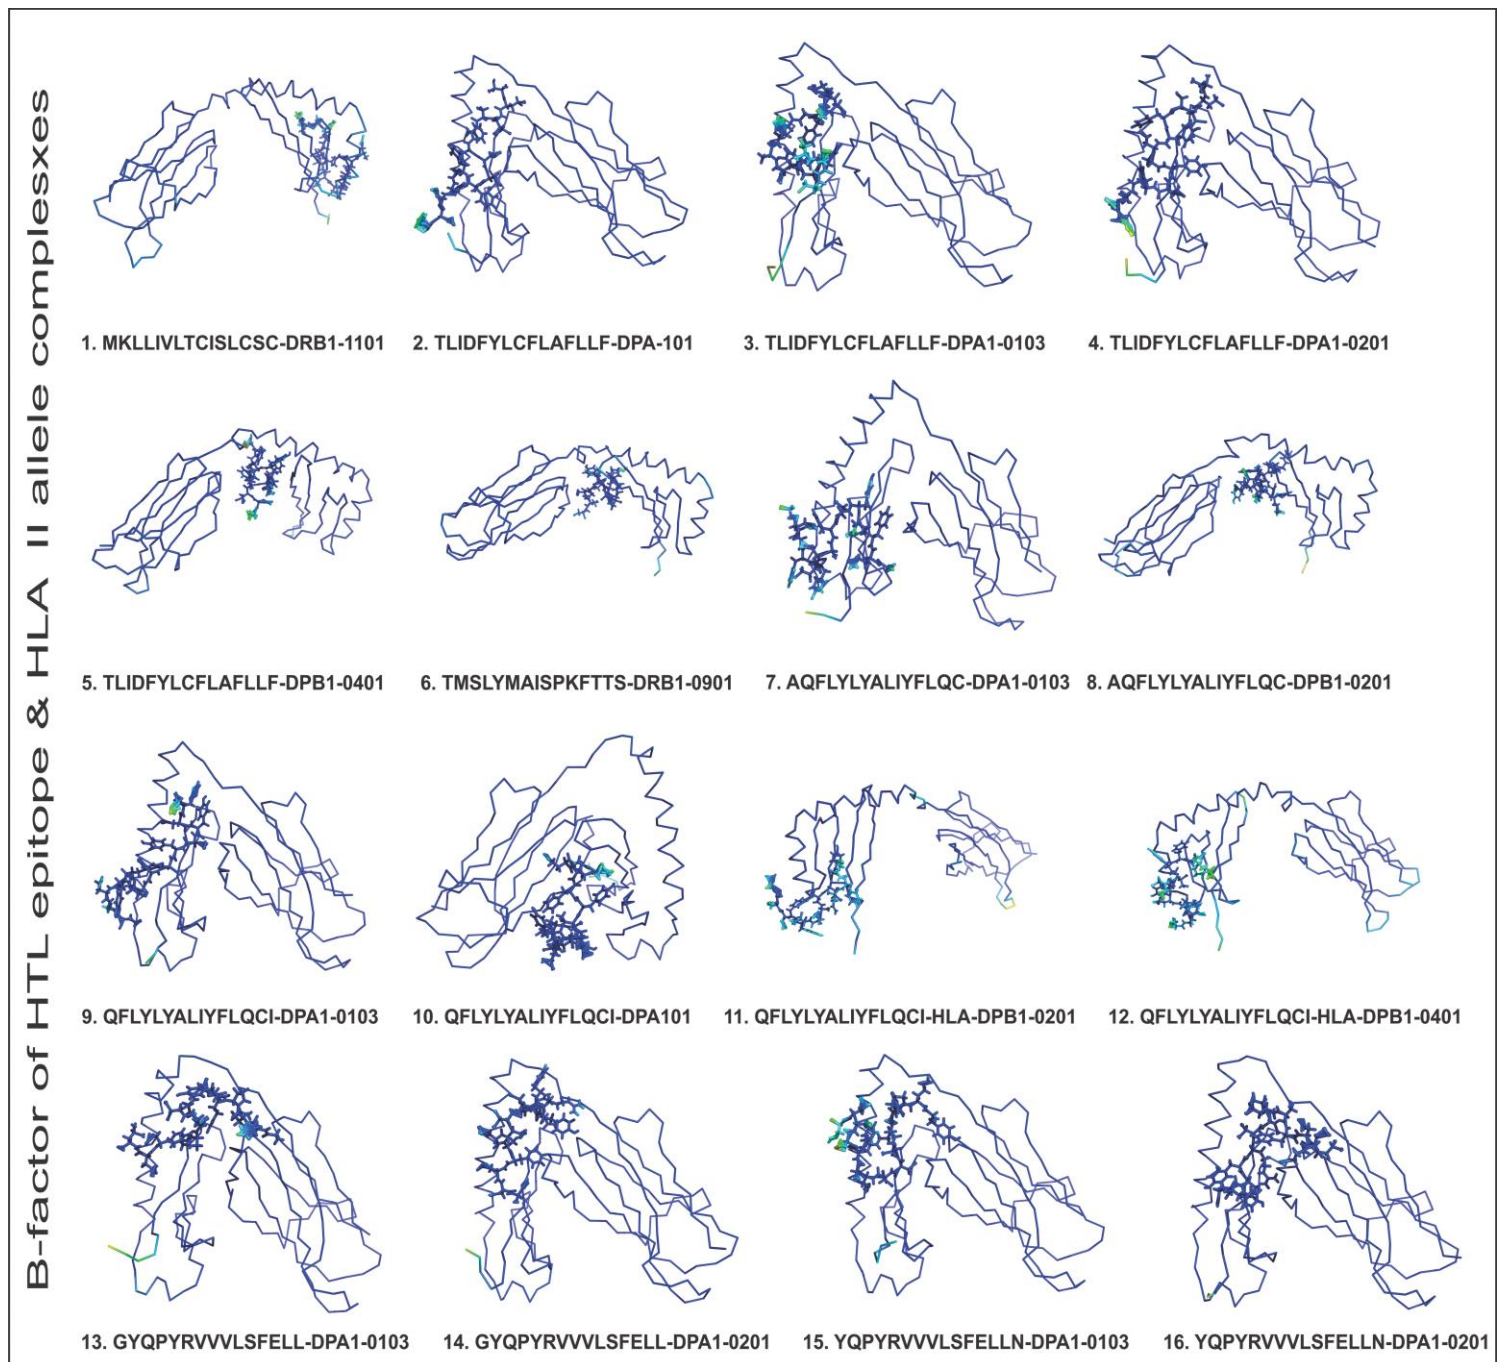

**Supplementary figure S4 (B).** B-Factor of HTL epitope & HLA class II allele complexes.

Epitopes are shown in sticks and HLA alleles are shown in cartoons. The regions of complexes are shown in rainbow (VIBGYOR), the regions in blue being very stable and the

region towards red being relatively unstable. In the complexes shown above, most of the regions are in blue indicating the complexes to be highly stable.
